# Supplementary material for: Gene expression during zombie ant biting behavior reflects the complexity underlying fungal parasitic behavioral manipulation
Source: PubMed Central journal article supplement (PMC4545319; doi:10.1186/s12864-015-1812-x), 2015-08-19
Supplement: 12864_2015_1812_MOESM1_ESM.pdf [file 12864_2015_1812_MOESM1_ESM.pdf]

## Metabolism

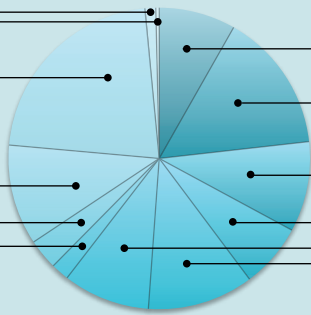

|                                              |     |
|----------------------------------------------|-----|
| Of other amino acids:                        | 16  |
| Of terpenoids and polyketides:               | 27  |
| Nucleotide metabolism:                       | 89  |
| Overview:                                    | 183 |
| Biosynthesis of other secondary metabolites: | 3   |
| Xenobiotics biodegradation and metabolism:   | 9   |
| Lipid metabolism:                            | 94  |
| Of cofactors and vitamins:                   | 77  |
| Glycan biosynthesis and metabolism:          | 57  |
| Energy metabolism:                           | 80  |
| Carbohydrate metabolism:                     | 124 |
| Amino acid metabolism:                       | 68  |

## Organismal Systems

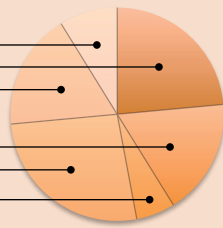

|                           |   |
|---------------------------|---|
| Environmental adaptation: | 2 |
| Excretory system:         | 9 |
| Endocrine system:         | 6 |
| Immune system:            | 6 |
| Digestive system:         | 8 |
| Nervous system:           | 3 |

## Cellular Processes

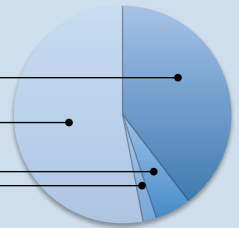

|                           |    |
|---------------------------|----|
| Cellular community:       | 3  |
| Cell motility:            | 8  |
| Transport and catabolism: | 79 |
| Cell growth and death:    | 59 |

## Environmental Information Processing

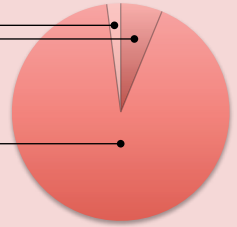

|                                      |    |
|--------------------------------------|----|
| Signal transduction:                 | 89 |
| Membrane transport:                  | 6  |
| Signaling molecules and interaction: | 2  |

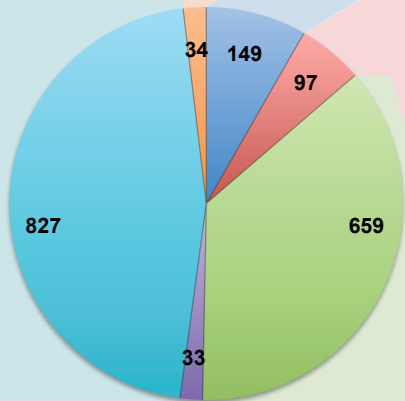

## Human Diseases

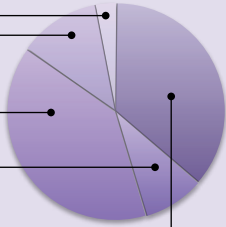

|                              |    |
|------------------------------|----|
| Cancers:                     | 12 |
| Immune diseases:             | 3  |
| Infectious diseases:         | 13 |
| Neuro degenerative diseases: | 4  |
| Substance dependence:        | 1  |

## Genetic Information Processing

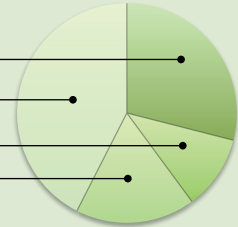

|                                   |     |
|-----------------------------------|-----|
| Transcription:                    | 116 |
| Replication and repair:           | 72  |
| Translation:                      | 280 |
| Folding, sorting and degradation: | 191 |
