# Supplementary material for: Gene expression during zombie ant biting behavior reflects the complexity underlying fungal parasitic behavioral manipulation
Source: PubMed Central journal article supplement (PMC4545319; doi:10.1186/s12864-015-1812-x), 2015-08-19
Supplement: 12864_2015_1812_MOESM3_ESM.pdf [file 12864_2015_1812_MOESM3_ESM.pdf]

| Lane | Sample ID | Description                                 | Yield (Mbases) | # Reads    | % of raw clusters per lane | % of >= Q30 Bases (PF) | Mean Quality Score (PF) | % Reads mapping to <i>O. unilateralis s.l.</i> genome | % Reads mapping to <i>C. floridanus</i> genome |
|------|-----------|---------------------------------------------|----------------|------------|----------------------------|------------------------|-------------------------|-------------------------------------------------------|------------------------------------------------|
| 1    | 13SC16a   | <i>O. unilateralis s.l.</i> control         | 1,425          | 14,251,542 | 5.26                       | 88.42                  | 34.26                   | 81.1                                                  | n/a                                            |
| 2    | 13SC16a   | <i>O. unilateralis s.l.</i> control         | 1,444          | 14,442,488 | 5.33                       | 88.41                  | 34.26                   |                                                       |                                                |
| 1    | 14SC16a   | <i>O. unilateralis s.l.</i> control         | 2,068          | 20,683,990 | 7.64                       | 88.37                  | 34.26                   | 82.0                                                  | n/a                                            |
| 2    | 14SC16a   | <i>O. unilateralis s.l.</i> control         | 2,094          | 20,943,060 | 7.72                       | 88.38                  | 34.27                   |                                                       |                                                |
| 1    | 15SC16a   | <i>O. unilateralis s.l.</i> control         | 1,874          | 18,743,720 | 6.92                       | 88.43                  | 34.28                   | 81.1                                                  | n/a                                            |
| 2    | 15SC16a   | <i>O. unilateralis s.l.</i> control         | 1,887          | 18,865,090 | 6.96                       | 88.42                  | 34.28                   |                                                       |                                                |
| 1    | 10HA2     | <i>C. castaneus</i> control at 2PM          | 1,741          | 17,406,504 | 6.43                       | 92.53                  | 35.93                   | n/a                                                   | 27.3                                           |
| 2    | 10HA2     | <i>C. castaneus</i> control at 2PM          | 1,731          | 17,312,344 | 6.38                       | 92.35                  | 35.88                   |                                                       |                                                |
| 1    | 11HA2     | <i>C. castaneus</i> control at 2PM          | 1,808          | 18,083,132 | 6.68                       | 92.42                  | 35.91                   | n/a                                                   | 26.9                                           |
| 2    | 11HA2     | <i>C. castaneus</i> control at 2PM          | 1,798          | 17,984,200 | 6.63                       | 92.22                  | 35.86                   |                                                       |                                                |
| 1    | 12HA2     | <i>C. castaneus</i> control at 2PM          | 1,376          | 13,761,068 | 5.08                       | 92.45                  | 35.9                    | n/a                                                   | 28.8                                           |
| 2    | 12HA2     | <i>C. castaneus</i> control at 2PM          | 1,367          | 13,671,646 | 5.04                       | 92.27                  | 35.85                   |                                                       |                                                |
| 1    | 7HA10     | <i>C. castaneus</i> control at 10AM         | 1,176          | 11,757,876 | 4.34                       | 92.3                   | 35.83                   | n/a                                                   | 29.0                                           |
| 2    | 7HA10     | <i>C. castaneus</i> control at 10AM         | 1,173          | 11,729,986 | 4.33                       | 92.13                  | 35.78                   |                                                       |                                                |
| 1    | 8HA10     | <i>C. castaneus</i> control at 10AM         | 1,801          | 18,005,462 | 6.65                       | 92.43                  | 35.88                   | n/a                                                   | 25.7                                           |
| 2    | 8HA10     | <i>C. castaneus</i> control at 10AM         | 1,788          | 17,883,278 | 6.59                       | 92.28                  | 35.84                   |                                                       |                                                |
| 1    | 9HA10     | <i>C. castaneus</i> control at 10AM         | 2,046          | 20,460,248 | 7.56                       | 91.9                   | 35.73                   | n/a                                                   | 26.3                                           |
| 2    | 9HA10     | <i>C. castaneus</i> control at 10AM         | 2,034          | 20,344,976 | 7.5                        | 91.73                  | 35.68                   |                                                       |                                                |
| 1    | 1Cc6L     | live infected ant head during manipulation  | 1,838          | 18,384,106 | 6.79                       | 89.88                  | 34.87                   | 45.6                                                  | 15.7                                           |
| 2    | 1Cc6L     | live infected ant head during manipulation  | 1,847          | 18,470,768 | 6.81                       | 89.77                  | 34.84                   |                                                       |                                                |
| 1    | 2Cc7L     | live infected ant head during manipulation  | 1,857          | 18,566,820 | 6.86                       | 89.55                  | 34.77                   | 40.2                                                  | 16.8                                           |
| 2    | 2Cc7L     | live infected ant head during manipulation  | 1,861          | 18,607,708 | 6.86                       | 89.42                  | 34.73                   |                                                       |                                                |
| 1    | 3Cc8L     | live infected ant head during manipulation  | 1,808          | 18,079,164 | 6.68                       | 88.59                  | 34.42                   | 55.0                                                  | 11.3                                           |
| 2    | 3Cc8L     | live infected ant head during manipulation  | 1,813          | 18,129,654 | 6.69                       | 88.52                  | 34.4                    |                                                       |                                                |
| 1    | 4Cc3D     | dead infected ant head after manipulation   | 1,793          | 17,929,616 | 6.62                       | 88.83                  | 34.44                   | 67.1                                                  | 6.8                                            |
| 2    | 4Cc3D     | dead infected ant head after manipulation   | 1,805          | 18,053,878 | 6.66                       | 88.79                  | 34.43                   |                                                       |                                                |
| 1    | 5Cc4D     | dead infected ant head after manipulation   | 1,700          | 16,996,412 | 6.28                       | 88.76                  | 34.44                   | 59.8                                                  | 9.4                                            |
| 2    | 5Cc4D     | dead infected ant head after manipulation   | 1,714          | 17,142,746 | 6.32                       | 88.7                   | 34.42                   |                                                       |                                                |
| 1    | 6Cc5D     | dead infected ant head after manipulation   | 1,909          | 19,094,148 | 7.05                       | 88.73                  | 34.45                   | 56.3                                                  | 10.9                                           |
| 2    | 6Cc5D     | dead infected ant head after manipulation   | 1,915          | 19,153,566 | 7.06                       | 88.67                  | 34.44                   |                                                       |                                                |
| 1    | lane1     | Clusters with unmatched barcodes for lane 1 | 849            | 8,492,704  | 3.14                       | 79.59                  | 31.68                   | n/a                                                   | n/a                                            |
| 2    | lane2     | Clusters with unmatched barcodes for lane 2 | 846            | 8,462,100  | 3.12                       | 80.02                  | 31.83                   | n/a                                                   | n/a                                            |
