# Supplementary material for: Gene expression during zombie ant biting behavior reflects the complexity underlying fungal parasitic behavioral manipulation
Source: PubMed Central journal article supplement (PMC4545319; doi:10.1186/s12864-015-1812-x), 2015-08-19
Supplement: 12864_2015_1812_MOESM6_ESM.pdf [file 12864_2015_1812_MOESM6_ESM.pdf]

## Baseline Culture vs Manipulated Biting Behavior

**Table 1:** Overrepresentation of annotation terms within the total of 1417 up-regulated *Ophiocordyceps unilateralis s.l.* genes (2-fold and significant  $Q < 0.05$ , minimum expression of 4) in live manipulated *Camponotus castaneus* ant heads (Manipulated Biting Behavior samples) compared to gene expression in culture (Fungal Baseline Expression samples)

| GO Annotation term                        | # up-regulated proteins with annotation term | # up-regulated proteins without annotation term | # other proteins with annotation term | # other proteins without annotation term | log odds ratio | p-value (uncorrected) | p-value (corrected) |
|-------------------------------------------|----------------------------------------------|-------------------------------------------------|---------------------------------------|------------------------------------------|----------------|-----------------------|---------------------|
| GO:0006259 DNA metabolic process          | 50                                           | 1367                                            | 74                                    | 6340                                     | 1.14221812293  | 4.98230015171e-09     | 4.43424713502e-06   |
| GO:0008150 biological process             | 566                                          | 851                                             | 2093                                  | 4321                                     | 0.317070363116 | 1.87742447616e-07     | 6.52162866388e-05   |
| GO:0006260 DNA replication                | 19                                           | 1398                                            | 13                                    | 6401                                     | 1.90090120605  | 2.19830179682e-07     | 6.52162866388e-05   |
| GO:0044699 single-organism process        | 282                                          | 1135                                            | 936                                   | 5478                                     | 0.374399014368 | 1.12665033172e-06     | 0.000250679698809   |
| GO:0016491 oxidoreductase activity        | 132                                          | 1285                                            | 381                                   | 6033                                     | 0.486488228571 | 7.99075905152e-06     | 0.00130964768009    |
| GO:0008152 metabolic process              | 403                                          | 1014                                            | 1466                                  | 4948                                     | 0.293724228861 | 1.19839023669e-05     | 0.00152366758665    |
| GO:0055114 oxidation-reduction process    | 110                                          | 1307                                            | 307                                   | 6107                                     | 0.515333837804 | 1.48655626704e-05     | 0.00165379384708    |
| GO:0003677 DNA binding                    | 73                                           | 1344                                            | 183                                   | 6231                                     | 0.614859879768 | 3.19129477623e-05     | 0.00315583594539    |
| GO:0090304 nucleic acid metabolic process | 91                                           | 1326                                            | 261                                   | 6153                                     | 0.481111975189 | 0.000215577843582     | 0.0147587908299     |
| GO:0046906 tetrapyrrole binding           | 34                                           | 1383                                            | 70                                    | 6344                                     | 0.801119714217 | 0.000280017168942     | 0.0166143520239     |
| GO:0020037 heme binding                   | 34                                           | 1383                                            | 70                                    | 6344                                     | 0.801119714217 | 0.000280017168942     | 0.0166143520239     |
| GO:0003824 catalytic activity             | 413                                          | 1004                                            | 1587                                  | 4827                                     | 0.224080007843 | 0.000672328428995     | 0.0351983706945     |

| PFAM Annotation term            | # up-regulated proteins with annotation term | # up-regulated proteins without annotation term | # other proteins with annotation term | # other proteins without annotation term | log odds ratio | p-value (uncorrected) | p-value (corrected) |
|---------------------------------|----------------------------------------------|-------------------------------------------------|---------------------------------------|------------------------------------------|----------------|-----------------------|---------------------|
| PF00493.18 MCM2/3/5 family      | 6                                            | 1411                                            | 0                                     | 6414                                     | NaN            | 3.47972191271e-05     | 0.0149280070055     |
| PF14551.1 MCM N-terminal domain | 6                                            | 1411                                            | 1                                     | 6413                                     | 3.30578797652  | 0.000205932833298     | 0.0441725927424     |

| TF Annotation term            | # up-regulated proteins with annotation term | # up-regulated proteins without annotation term | # other proteins with annotation term | # other proteins without annotation term | log odds ratio | p-value (uncorrected) | p-value (corrected) |
|-------------------------------|----------------------------------------------|-------------------------------------------------|---------------------------------------|------------------------------------------|----------------|-----------------------|---------------------|
| TF: Heteromeric CCAAT factors | 6                                            | 1411                                            | 4                                     | 6410                                     | 1.91902570617  | 0.00374884463722      | 0.0449861356467     |

| <b>Secretome Annotation term</b>           | <b># up-regulated proteins with annotation term</b> | <b># up-regulated proteins without annotation term</b> | <b># other proteins with annotation term</b> | <b># other proteins without annotation term</b> | <b>log odds ratio</b> | <b>p-value (uncorrected)</b> | <b>p-value (corrected)</b> |
|--------------------------------------------|-----------------------------------------------------|--------------------------------------------------------|----------------------------------------------|-------------------------------------------------|-----------------------|------------------------------|----------------------------|
| secretome<br>Has a SignalP signal sequence | 191                                                 | 1226                                                   | 700                                          | 5714                                            | 0.240355559298        | 0.00728703327334             | 0.00728703327334           |

| <b>KEGG Annotation term</b>                  | <b># up-regulated proteins with annotation term</b> | <b># up-regulated proteins without annotation term</b> | <b># other proteins with annotation term</b> | <b># other proteins without annotation term</b> | <b>log odds ratio</b> | <b>p-value (uncorrected)</b> | <b>p-value (corrected)</b> |
|----------------------------------------------|-----------------------------------------------------|--------------------------------------------------------|----------------------------------------------|-------------------------------------------------|-----------------------|------------------------------|----------------------------|
| KEGG third level: DNA replication            | 24                                                  | 1393                                                   | 8                                            | 6406                                            | 2.62438764506         | 3.02851754904e-12            | 9.44897475301e-10          |
| KEGG second level: Replication and repair    | 43                                                  | 1374                                                   | 54                                           | 6360                                            | 1.30451825268         | 1.76355254575e-09            | 2.75114197137e-07          |
| KEGG third level: Mismatch repair            | 13                                                  | 1404                                                   | 9                                            | 6405                                            | 1.88547840987         | 2.06644508055e-05            | 0.00128946173026           |
| KEGG third level: Cell cycle - yeast         | 28                                                  | 1389                                                   | 45                                           | 6369                                            | 1.04840042802         | 4.18195223335e-05            | 0.00217461516134           |
| KEGG third level: Cell cycle                 | 21                                                  | 1396                                                   | 31                                           | 6383                                            | 1.13056243517         | 0.000166773239788            | 0.00743332154485           |
| KEGG third level: Homologous recombination   | 10                                                  | 1407                                                   | 7                                            | 6407                                            | 1.87260630846         | 0.00020559123882             | 0.00801805831396           |
| KEGG EC: EC:3.6.4.12                         | 8                                                   | 1409                                                   | 5                                            | 6409                                            | 1.98482664885         | 0.000610995888747            | 0.0160636811794            |
| KEGG second level: Cell growth and death     | 34                                                  | 1383                                                   | 75                                           | 6339                                            | 0.731338385699        | 0.000956305820871            | 0.0225361965483            |
| KEGG third level: Meiosis - yeast            | 20                                                  | 1397                                                   | 34                                           | 6380                                            | 0.98821276602         | 0.00101123958871             | 0.0225361965483            |
| KEGG third level: Cyanoamino acid metabolism | 7                                                   | 1410                                                   | 5                                            | 6409                                            | 1.85058578475         | 0.00211874797688             | 0.0388852569874            |
| KEGG third level: Pyrimidine metabolism      | 20                                                  | 1397                                                   | 37                                           | 6377                                            | 0.903185047968        | 0.00264923631153             | 0.0435032489051            |
| KEGG third level: Alcoholism                 | 9                                                   | 1408                                                   | 10                                           | 6404                                            | 1.40939202174         | 0.00326913488038             | 0.0485700039371            |

**Table 2:** Overrepresentation of annotation terms within the total of 1153 down-regulated *Ophiocordyceps unilateralis s.l.* genes (2-fold and significant  $Q < 0.05$ , minimum expression of 4) in live manipulated *Camponotus castaneus* ant heads (Manipulated Biting Behavior samples) compared to gene expression in culture (Fungal Baseline Expression samples)

| GO Annotation term                        | # down-regulated proteins with annotation term | # down-regulated proteins without annotation term | # other proteins with annotation term | # other proteins without annotation term | log odds ratio | p-value (uncorrected) | p-value (corrected) |
|-------------------------------------------|------------------------------------------------|---------------------------------------------------|---------------------------------------|------------------------------------------|----------------|-----------------------|---------------------|
| GO:0005975 carbohydrate metabolic process | 42                                             | 1111                                              | 116                                   | 6562                                     | 0.760114351058 | 9.08584012242e-05     | 0.00577599836354    |
| GO:0006006 glucose metabolic process      | 5                                              | 1148                                              | 2                                     | 6676                                     | 2.67678843978  | 0.0011118507602       | 0.0299862780782     |
| GO:0019318 hexose metabolic process       | 7                                              | 1146                                              | 7                                     | 6671                                     | 1.76149215543  | 0.00195447101754      | 0.0483188668225     |

| SSP Annotation term           | # down-regulated proteins with annotation term | # down-regulated proteins without annotation term | # other proteins with annotation term | # other proteins without annotation term | log odds ratio | p-value (uncorrected) | p-value (corrected) |
|-------------------------------|------------------------------------------------|---------------------------------------------------|---------------------------------------|------------------------------------------|----------------|-----------------------|---------------------|
| SSP<br>Small Secreted Protein | 63                                             | 1090                                              | 235                                   | 6443                                     | 0.460365786163 | 0.00256692912628      | 0.00256692912628    |

| secretome Annotation term                  | # down-regulated proteins with annotation term | # down-regulated proteins without annotation term | # other proteins with annotation term | # other proteins without annotation term | log odds ratio | p-value (uncorrected) | p-value (corrected) |
|--------------------------------------------|------------------------------------------------|---------------------------------------------------|---------------------------------------|------------------------------------------|----------------|-----------------------|---------------------|
| secretome<br>Has a SignalP signal sequence | 169                                            | 984                                               | 722                                   | 5956                                     | 0.348402072782 | 0.000239041976078     | 0.000239041976078   |

| TMHMM Annotation term                     | # down-regulated proteins with annotation term | # down-regulated proteins without annotation term | # other proteins with annotation term | # other proteins without annotation term | log odds ratio | p-value (uncorrected) | p-value (corrected) |
|-------------------------------------------|------------------------------------------------|---------------------------------------------------|---------------------------------------|------------------------------------------|----------------|-----------------------|---------------------|
| TMHMM<br>Has transmembrane domain (TMHMM) | 246                                            | 907                                               | 1247                                  | 5431                                     | 0.166571698172 | 0.0348129915018       | 0.0348129915018     |

| <b>KEGG Annotation term</b>                                   | <b># down-regulated proteins with annotation term</b> | <b># down-regulated proteins without annotation term</b> | <b># other proteins with annotation term</b> | <b># other proteins without annotation term</b> | <b>log odds ratio</b> | <b>p-value (uncorrected)</b> | <b>p-value (corrected)</b> |
|---------------------------------------------------------------|-------------------------------------------------------|----------------------------------------------------------|----------------------------------------------|-------------------------------------------------|-----------------------|------------------------------|----------------------------|
| KEGG second level: Xenobiotics biodegradation and metabolism  | 21                                                    | 1132                                                     | 37                                           | 6641                                            | 1.20288109986         | 4.01972361973e-05            | 0.00209025628226           |
| KEGG third level: Pentose phosphate pathway                   | 10                                                    | 1143                                                     | 9                                            | 6669                                            | 1.8691740545          | 0.000119381274309            | 0.00465586969806           |
| KEGG third level: Carbon fixation in photosynthetic organisms | 9                                                     | 1144                                                     | 7                                            | 6671                                            | 2.01455330905         | 0.000135492869062            | 0.00469708612749           |
| KEGG second level: Carbohydrate metabolism                    | 48                                                    | 1105                                                     | 156                                          | 6522                                            | 0.596680746056        | 0.000859074294548            | 0.0243664708999            |
| KEGG third level: Carotenoid biosynthesis                     | 4                                                     | 1149                                                     | 1                                            | 6677                                            | 3.14607114713         | 0.00206458743471             | 0.0460108056877            |
| KEGG third level: Caprolactam degradation                     | 4                                                     | 1149                                                     | 1                                            | 6677                                            | 3.14607114713         | 0.00206458743471             | 0.0460108056877            |

## Baseline Culture vs Death After Manipulated Biting Behavior

**Table 3:** Overrepresentation of annotation terms within the total of 1050 up-regulated *Ophiocordyceps unilateralis* genes (2-fold and significant  $Q < 0.05$ , minimum expression of 4) in dead *Camponotus castaneus* ant heads after manipulation (Death After Manipulation samples) compared to gene expression in culture (Fungal Baseline Expression samples)

| GO Annotation term               | # up-regulated proteins with annotation term | # up-regulated proteins without annotation term | # other proteins with annotation term | # other proteins without annotation term | log odds ratio | p-value (uncorrected) | p-value (corrected) |
|----------------------------------|----------------------------------------------|-------------------------------------------------|---------------------------------------|------------------------------------------|----------------|-----------------------|---------------------|
| GO:0008150 biological process    | 419                                          | 631                                             | 2240                                  | 4541                                     | 0.29723644363  | 1.61726975844e-05     | 0.00719685042508    |
| GO:0006259 DNA metabolic process | 35                                           | 1015                                            | 89                                    | 6692                                     | 0.952735862388 | 1.23541224104e-05     | 0.00719685042508    |
| GO:0006260 DNA replication       | 13                                           | 1037                                            | 19                                    | 6762                                     | 1.49549715333  | 0.000123319793546     | 0.0245190864968     |
| GO:0008152 metabolic process     | 301                                          | 749                                             | 1568                                  | 5213                                     | 0.289725865089 | 0.00011587755697      | 0.0245190864968     |

| KEGG Annotation term                                          | # up-regulated proteins with annotation term | # up-regulated proteins without annotation term | # other proteins with annotation term | # other proteins without annotation term | log odds ratio | p-value (uncorrected) | p-value (corrected) |
|---------------------------------------------------------------|----------------------------------------------|-------------------------------------------------|---------------------------------------|------------------------------------------|----------------|-----------------------|---------------------|
| KEGG third level: DNA replication                             | 19                                           | 1031                                            | 13                                    | 6768                                     | 2.26116603897  | 1.39354422702e-09     | 4.34785798832e-07   |
| KEGG second level: Replication and repair                     | 30                                           | 1020                                            | 67                                    | 6714                                     | 1.08089703353  | 6.19996550035e-06     | 0.000386877847222   |
| KEGG third level: Mismatch repair                             | 12                                           | 1038                                            | 10                                    | 6771                                     | 2.05767455855  | 5.6197539803e-06      | 0.000386877847222   |
| KEGG third level: Cell cycle - yeast                          | 25                                           | 1025                                            | 48                                    | 6733                                     | 1.23000301093  | 4.33903310599e-06     | 0.000386877847222   |
| KEGG third level: Alcoholism                                  | 9                                            | 1041                                            | 10                                    | 6771                                     | 1.76710648121  | 0.000353561337683     | 0.0157587339082     |
| KEGG second level: Cell growth and death                      | 28                                           | 1022                                            | 81                                    | 6700                                     | 0.818101390118 | 0.000538365421242     | 0.0209962514284     |
| KEGG third level: Valine, leucine and isoleucine biosynthesis | 7                                            | 1043                                            | 6                                     | 6775                                     | 2.02528887057  | 0.000626842384832     | 0.0217305360075     |
| KEGG third level: Cell cycle                                  | 16                                           | 1034                                            | 36                                    | 6745                                     | 1.06443649736  | 0.0014358949918       | 0.0447999237442     |

**Table 4:** Overrepresentation of annotation terms within the total of 1218 down-regulated *Ophiocordyceps unilateralis* genes (2-fold and significant  $Q < 0.05$ , minimum expression of 4) in dead *Camponotus castaneus* ant heads after manipulation (Death After Manipulation samples) compared to gene expression in culture (Fungal Baseline Expression samples)

| GO Annotation term                                                                           | # down-regulated proteins with annotation term | # down-regulated proteins without annotation term | # other proteins with annotation term | # other proteins without annotation term | log odds ratio | p-value (uncorrected) | p-value (corrected) |
|----------------------------------------------------------------------------------------------|------------------------------------------------|---------------------------------------------------|---------------------------------------|------------------------------------------|----------------|-----------------------|---------------------|
| GO:0044765 single-organism transport                                                         | 73                                             | 1145                                              | 263                                   | 6350                                     | 0.431355584869 | 0.00204705200796      | 0.0267922983395     |
| GO:0055085 transmembrane transport                                                           | 63                                             | 1155                                              | 203                                   | 6410                                     | 0.543687674309 | 0.000392563933064     | 0.00727878959223    |
| GO:0016641 oxidoreductase activity, acting on the CH-NH2 group of donors, oxygen as acceptor | 5                                              | 1213                                              | 1                                     | 6612                                     | 3.30522746243  | 0.000472305349027     | 0.00824219138498    |
| GO:0009405 pathogenesis                                                                      | 13                                             | 1205                                              | 22                                    | 6591                                     | 1.17313241923  | 0.00150694301696      | 0.0206335274631     |
| GO:0051704 multi-organism process                                                            | 13                                             | 1205                                              | 23                                    | 6590                                     | 1.1285289231   | 0.00202815207176      | 0.0267922983395     |

| PFAM Annotation term                     | # down-regulated proteins with annotation term | # down-regulated proteins without annotation term | # other proteins with annotation term | # other proteins without annotation term | log odds ratio | p-value (uncorrected) | p-value (corrected) |
|------------------------------------------|------------------------------------------------|---------------------------------------------------|---------------------------------------|------------------------------------------|----------------|-----------------------|---------------------|
| PF07690.11 Major Facilitator Superfamily | 33                                             | 1185                                              | 75                                    | 6538                                     | 0.886907981645 | 7.57319364126e-05     | 0.032489000721      |
| PF00083.19 Sugar (and other) transporter | 22                                             | 1196                                              | 43                                    | 6570                                     | 1.03337351463  | 0.000213372924259     | 0.0457684922535     |

| SSP Annotation term           | # down-regulated proteins with annotation term | # down-regulated proteins without annotation term | # other proteins with annotation term | # other proteins without annotation term | log odds ratio | p-value (uncorrected) | p-value (corrected) |
|-------------------------------|------------------------------------------------|---------------------------------------------------|---------------------------------------|------------------------------------------|----------------|-----------------------|---------------------|
| SSP<br>Small Secreted Protein | 67                                             | 1151                                              | 231                                   | 6382                                     | 0.475125306985 | 0.00140259440063      | 0.00140259440063    |

| Secretome Annotation term                  | # down-regulated proteins with annotation term | # down-regulated proteins without annotation term | # other proteins with annotation term | # other proteins without annotation term | log odds ratio | p-value (uncorrected) | p-value (corrected) |
|--------------------------------------------|------------------------------------------------|---------------------------------------------------|---------------------------------------|------------------------------------------|----------------|-----------------------|---------------------|
| secretome<br>Has a SignalP signal sequence | 188                                            | 1030                                              | 703                                   | 5910                                     | 0.428172100196 | 2.88772207093e-06     | 2.88772207093e-06   |

| <b>TMHMM Annotation term</b>              | <b># down-regulated proteins with annotation term</b> | <b># down-regulated proteins without annotation term</b> | <b># other proteins with annotation term</b> | <b># other proteins without annotation term</b> | <b>log odds ratio</b> | <b>p-value (uncorrected)</b> | <b>p-value (corrected)</b> |
|-------------------------------------------|-------------------------------------------------------|----------------------------------------------------------|----------------------------------------------|-------------------------------------------------|-----------------------|------------------------------|----------------------------|
| TMHMM<br>Has transmembrane domain (TMHMM) | 290                                                   | 928                                                      | 1203                                         | 5410                                            | 0.34027984606         | 7.10575527309e-06            | 7.10575527309e-06          |

| <b>KEGG Annotation term</b>                                  | <b># down-regulated proteins with annotation term</b> | <b># down-regulated proteins without annotation term</b> | <b># other proteins with annotation term</b> | <b># other proteins without annotation term</b> | <b>log odds ratio</b> | <b>p-value (uncorrected)</b> | <b>p-value (corrected)</b> |
|--------------------------------------------------------------|-------------------------------------------------------|----------------------------------------------------------|----------------------------------------------|-------------------------------------------------|-----------------------|------------------------------|----------------------------|
| KEGG third level: Valine, leucine and isoleucine degradation | 12                                                    | 1206                                                     | 17                                           | 6596                                            | 1.35084761212         | 0.000746156946118            | 0.0145500604493            |

## Manipulated Biting Behavior vs Death After Manipulated Biting Behavior

**Table 5:** Overrepresentation of annotation terms within the total of 259 up-regulated *Ophiocordyceps unilateralis* genes (2-fold and significant  $Q < 0.05$ , minimum expression of 4) in dead *Camponotus castaneus* ant heads after manipulation (Death After Manipulation samples) compared to gene expression in live manipulated *Camponotus castaneus* ant heads (Manipulated Biting Behavior samples)

| GO Annotation term                                        | # up-regulated proteins with annotation term | # up-regulated proteins without annotation term | # other proteins with annotation term | # other proteins without annotation term | log odds ratio | p-value (uncorrected) | p-value (corrected) |
|-----------------------------------------------------------|----------------------------------------------|-------------------------------------------------|---------------------------------------|------------------------------------------|----------------|-----------------------|---------------------|
| GO:0006928 cellular component movement                    | 4                                            | 255                                             | 7                                     | 7565                                     | 2.83040829313  | 0.000321095077178     | 0.0408249455269     |
| GO:0016853 isomerase activity                             | 7                                            | 252                                             | 30                                    | 7542                                     | 1.9435263577   | 0.00017549125834      | 0.0408249455269     |
| GO:0007018 microtubule-based movement                     | 4                                            | 255                                             | 7                                     | 7565                                     | 2.83040829313  | 0.000321095077178     | 0.0408249455269     |
| GO:0005975 carbohydrate metabolic process                 | 15                                           | 244                                             | 143                                   | 7429                                     | 1.1611838847   | 0.000219924957627     | 0.0408249455269     |
| GO:0003777 microtubule motor activity                     | 4                                            | 255                                             | 7                                     | 7565                                     | 2.83040829313  | 0.000321095077178     | 0.0408249455269     |
| GO:0044723 single-organism carbohydrate metabolic process | 9                                            | 250                                             | 57                                    | 7515                                     | 1.55736869383  | 0.000292764990053     | 0.0408249455269     |
| GO:0003774 motor activity                                 | 5                                            | 254                                             | 11                                    | 7561                                     | 2.60496710818  | 0.000123271054262     | 0.0408249455269     |

| Secretome Annotation term                  | # up-regulated proteins with annotation term | # up-regulated proteins without annotation term | # other proteins with annotation term | # other proteins without annotation term | log odds ratio | p-value (uncorrected) | p-value (corrected) |
|--------------------------------------------|----------------------------------------------|-------------------------------------------------|---------------------------------------|------------------------------------------|----------------|-----------------------|---------------------|
| secretome<br>Has a SignalP signal sequence | 47                                           | 212                                             | 844                                   | 6728                                     | 0.569442034095 | 0.000967872785157     | 0.000967872785157   |

| KEGG Annotation term                           | # up-regulated proteins with annotation term | # up-regulated proteins without annotation term | # other proteins with annotation term | # other proteins without annotation term | log odds ratio | p-value (uncorrected) | p-value (corrected) |
|------------------------------------------------|----------------------------------------------|-------------------------------------------------|---------------------------------------|------------------------------------------|----------------|-----------------------|---------------------|
| KEGG third level: Glycolysis / Gluconeogenesis | 7                                            | 252                                             | 22                                    | 7550                                     | 2.25474145043  | 3.33654612578e-05     | 0.0104100239124     |
| KEGG second level: Carbohydrate metabolism     | 18                                           | 241                                             | 186                                   | 7386                                     | 1.0871697461   | 0.000134385855928     | 0.0209641935247     |



**Table 6:** Overrepresentation of annotation terms within the total of 821 down-regulated *Ophiocordyceps unilateralis* genes (2-fold and significant  $Q < 0.05$ , minimum expression of 4) in dead *Camponotus castaneus* ant heads after manipulation (Death After Manipulation samples) compared to gene expression in live manipulated *Camponotus castaneus* ant heads (Manipulated Biting Behavior samples)

| GO Annotation term                                                                                               | # down-regulated proteins with annotation term | # down-regulated proteins without annotation term | # other proteins with annotation term | # other proteins without annotation term | log odds ratio | p-value (uncorrected) | p-value (corrected) |
|------------------------------------------------------------------------------------------------------------------|------------------------------------------------|---------------------------------------------------|---------------------------------------|------------------------------------------|----------------|-----------------------|---------------------|
| GO:0016491 oxidoreductase activity                                                                               | 101                                            | 720                                               | 412                                   | 6598                                     | 0.80936780727  | 1.23102469289e-10     | 5.47805988334e-08   |
| GO:0055114 oxidation-reduction process                                                                           | 85                                             | 736                                               | 332                                   | 6678                                     | 0.842859989349 | 6.6669028379e-10      | 1.97784784191e-07   |
| GO:0005506 iron ion binding                                                                                      | 28                                             | 793                                               | 53                                    | 6957                                     | 1.53359300091  | 4.63477422448e-09     | 1.03123726495e-06   |
| GO:0044699 single-organism process                                                                               | 181                                            | 640                                               | 1037                                  | 5973                                     | 0.487946239415 | 1.8836863515e-07      | 2.13712262405e-05   |
| GO:0016705 oxidoreductase activity, acting on paired donors, with incorporation or reduction of molecular oxygen | 26                                             | 795                                               | 61                                    | 6949                                     | 1.31523360251  | 4.57484932146e-07     | 3.81213993388e-05   |
| GO:0046906 tetrapyrrole binding                                                                                  | 29                                             | 792                                               | 75                                    | 6935                                     | 1.21958265738  | 5.1399639558e-07      | 3.81213993388e-05   |
| GO:0020037 heme binding                                                                                          | 29                                             | 792                                               | 75                                    | 6935                                     | 1.21958265738  | 5.1399639558e-07      | 3.81213993388e-05   |
| GO:0055085 transmembrane transport                                                                               | 54                                             | 767                                               | 212                                   | 6798                                     | 0.814294700781 | 1.23186127613e-06     | 8.43351181354e-05   |
| GO:0006260 DNA replication                                                                                       | 13                                             | 808                                               | 19                                    | 6991                                     | 1.77832720629  | 8.74303781659e-06     | 0.000409542297725   |
| GO:0044710 single-organism metabolic process                                                                     | 123                                            | 698                                               | 689                                   | 6321                                     | 0.480356684069 | 1.22136957068e-05     | 0.000543509458951   |
| GO:0044765 single-organism transport                                                                             | 61                                             | 760                                               | 275                                   | 6735                                     | 0.675857422071 | 1.51265912288e-05     | 0.000641079342553   |
| GO:0003824 catalytic activity                                                                                    | 261                                            | 560                                               | 1739                                  | 5271                                     | 0.345493486094 | 2.26081590126e-05     | 0.000914602796417   |
| GO:0008152 metabolic process                                                                                     | 243                                            | 578                                               | 1626                                  | 5384                                     | 0.330796155885 | 6.71077802558e-05     | 0.00248858018449    |
| GO:0046914 transition metal ion binding                                                                          | 60                                             | 761                                               | 287                                   | 6723                                     | 0.61351875107  | 7.20675719041e-05     | 0.00256560555979    |
| GO:0016021 integral component of membrane                                                                        | 52                                             | 769                                               | 239                                   | 6771                                     | 0.65009326263  | 0.000120569497897     | 0.00383238761171    |
| GO:0008150 biological process                                                                                    | 328                                            | 493                                               | 2331                                  | 4679                                     | 0.289291486172 | 0.000155603589255     | 0.00477542049781    |
| GO:0006810 transport                                                                                             | 67                                             | 754                                               | 362                                   | 6648                                     | 0.489727376093 | 0.000831524380188     | 0.0205571305102     |
| GO:0051234 establishment of localization                                                                         | 67                                             | 754                                               | 365                                   | 6645                                     | 0.481022868948 | 0.000873736509789     | 0.0210169052355     |
| GO:0016701 oxidoreductase activity, acting on single donors with incorporation of molecular oxygen               | 6                                              | 815                                               | 7                                     | 7003                                     | 1.99675511459  | 0.00116963146842      | 0.0273940001813     |
| GO:0006259 DNA metabolic process                                                                                 | 25                                             | 796                                               | 99                                    | 6911                                     | 0.785026412981 | 0.0015622020603       | 0.0356502521453     |
| GO:0015994 chlorophyll metabolic process                                                                         | 4                                              | 817                                               | 1                                     | 7009                                     | 3.53560558276  | 0.000549993855775     | 0.0143968979894     |
| GO:0022857 transmembrane transporter activity                                                                    | 37                                             | 784                                               | 174                                   | 6836                                     | 0.617411637315 | 0.00188128892344      | 0.0398654081396     |
| GO:0046148 pigment biosynthetic process                                                                          | 5                                              | 816                                               | 5                                     | 7005                                     | 2.14996510381  | 0.00200910027597      | 0.0415837033863     |

| <b>PFAM Annotation term</b>              | <b># down-regulated proteins with annotation term</b> | <b># down-regulated proteins without annotation term</b> | <b># other proteins with annotation term</b> | <b># other proteins without annotation term</b> | <b>log odds ratio</b> | <b>p-value (uncorrected)</b> | <b>p-value (corrected)</b> |
|------------------------------------------|-------------------------------------------------------|----------------------------------------------------------|----------------------------------------------|-------------------------------------------------|-----------------------|------------------------------|----------------------------|
| PF07690.11 Major Facilitator Superfamily | 30                                                    | 791                                                      | 78                                           | 6932                                            | 1.21509423804         | 3.58702282228e-07            | 7.69416395379e-05          |
| PF00067.17 Cytochrome P450               | 21                                                    | 800                                                      | 38                                           | 6972                                            | 1.57198195697         | 2.24944357673e-07            | 7.69416395379e-05          |
| PF00493.18 MCM2/3/5 family               | 6                                                     | 815                                                      | 0                                            | 7010                                            | NaN                   | 1.30627662882e-06            | 0.000186797557921          |
| PF14551.1 MCM N-terminal domain          | 6                                                     | 815                                                      | 1                                            | 7009                                            | 3.94352167249         | 8.3276178439e-06             | 0.000893137013758          |
| PF01494.14 FAD binding domain            | 9                                                     | 812                                                      | 11                                           | 6999                                            | 1.95335152507         | 8.44602032234e-05            | 0.00724668543657           |

| <b>SSP Annotation term</b>    | <b># down-regulated proteins with annotation term</b> | <b># down-regulated proteins without annotation term</b> | <b># other proteins with annotation term</b> | <b># other proteins without annotation term</b> | <b>log odds ratio</b> | <b>p-value (uncorrected)</b> | <b>p-value (corrected)</b> |
|-------------------------------|-------------------------------------------------------|----------------------------------------------------------|----------------------------------------------|-------------------------------------------------|-----------------------|------------------------------|----------------------------|
| SSP<br>Small Secreted Protein | 56                                                    | 765                                                      | 242                                          | 6768                                            | 0.716499032038        | 1.12280474771e-05            | 1.12280474771e-05          |

| <b>Secretome Annotation term</b>           | <b># down-regulated proteins with annotation term</b> | <b># down-regulated proteins without annotation term</b> | <b># other proteins with annotation term</b> | <b># other proteins without annotation term</b> | <b>log odds ratio</b> | <b>p-value (uncorrected)</b> | <b>p-value (corrected)</b> |
|--------------------------------------------|-------------------------------------------------------|----------------------------------------------------------|----------------------------------------------|-------------------------------------------------|-----------------------|------------------------------|----------------------------|
| secretome<br>Has a SignalP signal sequence | 145                                                   | 676                                                      | 746                                          | 6264                                            | 0.588389303844        | 1.43741293616e-08            | 1.43741293616e-08          |

| <b>TMHMM Annotation term</b>              | <b># down-regulated proteins with annotation term</b> | <b># down-regulated proteins without annotation term</b> | <b># other proteins with annotation term</b> | <b># other proteins without annotation term</b> | <b>log odds ratio</b> | <b>p-value (uncorrected)</b> | <b>p-value (corrected)</b> |
|-------------------------------------------|-------------------------------------------------------|----------------------------------------------------------|----------------------------------------------|-------------------------------------------------|-----------------------|------------------------------|----------------------------|
| TMHMM<br>Has transmembrane domain (TMHMM) | 199                                                   | 622                                                      | 1294                                         | 5716                                            | 0.345895795974        | 0.000114175500511            | 0.000114175500511          |

| <b>KEGG Annotation term</b>                                    | <b># down-regulated proteins with annotation term</b> | <b># down-regulated proteins without annotation term</b> | <b># other proteins with annotation term</b> | <b># other proteins without annotation term</b> | <b>log odds ratio</b> | <b>p-value (uncorrected)</b> | <b>p-value (corrected)</b> |
|----------------------------------------------------------------|-------------------------------------------------------|----------------------------------------------------------|----------------------------------------------|-------------------------------------------------|-----------------------|------------------------------|----------------------------|
| KEGG third level: DNA replication                              | 15                                                    | 806                                                      | 17                                           | 6993                                            | 2.03541804224         | 1.82743060976e-07            | 1.90052783415e-05          |
| KEGG second level: Biosynthesis of other secondary metabolites | 11                                                    | 810                                                      | 22                                           | 6988                                            | 1.46176824303         | 0.00034710909788             | 0.0120331153932            |
| KEGG EC: EC:3.6.4.12                                           | 6                                                     | 815                                                      | 7                                            | 7003                                            | 1.99675511459         | 0.00116963146842             | 0.0260660727247            |
| KEGG third level: Valine, leucine and isoleucine degradation   | 9                                                     | 812                                                      | 20                                           | 6990                                            | 1.35422779885         | 0.00211387616001             | 0.0412205851202            |

| <b>secondary metabolism Annotation term</b>                                                                                   | <b># down-regulated proteins with annotation term</b> | <b># down-regulated proteins without annotation term</b> | <b># other proteins with annotation term</b> | <b># other proteins without annotation term</b> | <b>log odds ratio</b> | <b>p-value (uncorrected)</b> | <b>p-value (corrected)</b> |
|-------------------------------------------------------------------------------------------------------------------------------|-------------------------------------------------------|----------------------------------------------------------|----------------------------------------------|-------------------------------------------------|-----------------------|------------------------------|----------------------------|
| Present in secondary metabolism cluster<br>Backbone genes, decorating genes, and other genes in secondary metabolism clusters | 34                                                    | 787                                                      | 93                                           | 6917                                            | 1.16727021165         | 1.59419281765e-07            | 3.18838563531e-06          |
| Backbone genes and decorating genes<br>Backbone genes and decorating genes in secondary metabolism clusters                   | 22                                                    | 799                                                      | 55                                           | 6955                                            | 1.24756442672         | 7.88653354964e-06            | 7.88653354964e-05          |
| Decorating<br>Part of secondary metabolism cluster:<br>Decorating                                                             | 14                                                    | 807                                                      | 25                                           | 6985                                            | 1.57837810817         | 2.1287733216e-05             | 0.00014191822144           |
| Cluster 2<br>Part of secondary metabolism cluster 2                                                                           | 6                                                     | 815                                                      | 2                                            | 7008                                            | 3.25023180804         | 3.0342448112e-05             | 0.00015171224056           |
| Cluster 7<br>Part of secondary metabolism cluster 7                                                                           | 5                                                     | 816                                                      | 2                                            | 7008                                            | 3.06668400953         | 0.000219410990415            | 0.000877643961659          |
| Cluster 14<br>Part of secondary metabolism cluster 14                                                                         | 3                                                     | 818                                                      | 2                                            | 7008                                            | 2.55341040412         | 0.00976050133005             | 0.0278871466573            |
| NRPS<br>Part of secondary metabolism cluster:<br>NRPS                                                                         | 3                                                     | 818                                                      | 2                                            | 7008                                            | 2.55341040412         | 0.00976050133005             | 0.0278871466573            |
| Cluster 18<br>Part of secondary metabolism cluster 18                                                                         | 4                                                     | 817                                                      | 6                                            | 7004                                            | 1.74313249044         | 0.0150142832726              | 0.0375357081814            |

## Baseline Culture vs Manipulated Biting Behavior vs Death After Manipulated Biting Behavior

**Table 7:** Overrepresentation of annotation terms within the total of 498 *Ophiocordyceps unilateralis* genes that are up-regulated in live manipulated *Camponotus castaneus* ant heads (Manipulated Biting Behavior samples) compared to gene expression in culture (Fungal Baseline Expression samples) and down-regulated again after manipulation (Death After Manipulation samples) (2-fold and significant  $Q < 0.05$ , minimum expression of 4)

| GO Annotation term                                                                                               | # up-regulated proteins with annotation term | # up-regulated proteins without annotation term | # other proteins with annotation term | # other proteins without annotation term | log odds ratio | p-value (uncorrected) | p-value (corrected) |
|------------------------------------------------------------------------------------------------------------------|----------------------------------------------|-------------------------------------------------|---------------------------------------|------------------------------------------|----------------|-----------------------|---------------------|
| GO:0006260 DNA replication                                                                                       | 13                                           | 485                                             | 19                                    | 7314                                     | 2.33390708607  | 2.70555528716e-08     | 2.40794420558e-05   |
| GO:0005506 iron ion binding                                                                                      | 19                                           | 479                                             | 62                                    | 7271                                     | 1.53725310936  | 4.90095168185e-07     | 0.000109046174921   |
| GO:0016491 oxidoreductase activity                                                                               | 63                                           | 435                                             | 450                                   | 6883                                     | 0.795350994937 | 2.74427898953e-07     | 0.000109046174921   |
| GO:0055114 oxidation-reduction process                                                                           | 54                                           | 444                                             | 363                                   | 6970                                     | 0.848127153622 | 4.28479303053e-07     | 0.000109046174921   |
| GO:0006259 DNA metabolic process                                                                                 | 24                                           | 474                                             | 100                                   | 7233                                     | 1.29808548951  | 7.22814267915e-07     | 0.000128660939689   |
| GO:0016705 oxidoreductase activity, acting on paired donors, with incorporation or reduction of molecular oxygen | 18                                           | 480                                             | 69                                    | 7264                                     | 1.37316506968  | 6.71425922519e-06     | 0.000669626059953   |
| GO:0046906 tetrapyrrole binding                                                                                  | 20                                           | 478                                             | 84                                    | 7249                                     | 1.28392354952  | 6.77149948267e-06     | 0.000669626059953   |
| GO:0020037 heme binding                                                                                          | 20                                           | 478                                             | 84                                    | 7249                                     | 1.28392354952  | 6.77149948267e-06     | 0.000669626059953   |
| GO:0008150 biological process                                                                                    | 215                                          | 283                                             | 2444                                  | 4889                                     | 0.418542872772 | 1.0281652119e-05      | 0.000762555865491   |
| GO:0008152 metabolic process                                                                                     | 161                                          | 337                                             | 1708                                  | 5625                                     | 0.453219287356 | 1.00228906646e-05     | 0.000762555865491   |
| GO:0044699 single-organism process                                                                               | 113                                          | 385                                             | 1105                                  | 6228                                     | 0.503354403427 | 1.68119737065e-05     | 0.00115097358453    |
| GO:0003824 catalytic activity                                                                                    | 166                                          | 332                                             | 1834                                  | 5499                                     | 0.404919703131 | 6.49662498955e-05     | 0.00385466416047    |
| GO:0015994 chlorophyll metabolic process                                                                         | 4                                            | 494                                             | 1                                     | 7332                                     | 4.08376245289  | 7.67724137239e-05     | 0.00427046551339    |
| GO:0044710 single-organism metabolic process                                                                     | 78                                           | 420                                             | 734                                   | 6599                                     | 0.512618488181 | 0.000138474021694     | 0.00724952231219    |
| GO:0046914 transition metal ion binding                                                                          | 38                                           | 460                                             | 309                                   | 7024                                     | 0.63010652866  | 0.000967559054066     | 0.034923035487      |
| GO:0044765 single-organism transport                                                                             | 37                                           | 461                                             | 299                                   | 7034                                     | 0.635587109291 | 0.00085642184068      | 0.034923035487      |
| GO:0016798 hydrolase activity, acting on glycosyl bonds                                                          | 13                                           | 485                                             | 64                                    | 7269                                     | 1.11329139265  | 0.00102022350861      | 0.034923035487      |
| GO:0055085 transmembrane transport                                                                               | 31                                           | 467                                             | 235                                   | 7098                                     | 0.695640765879 | 0.00117921945857      | 0.0388705673382     |

| PFAM Annotation term                     | # up-regulated proteins with annotation term | # up-regulated proteins without annotation term | # other proteins with annotation term | # other proteins without annotation term | log odds ratio | p-value (uncorrected) | p-value (corrected) |
|------------------------------------------|----------------------------------------------|-------------------------------------------------|---------------------------------------|------------------------------------------|----------------|-----------------------|---------------------|
| PF00493.18 MCM2/3/5 family               | 6                                            | 492                                             | 0                                     | 7333                                     | NaN            | 6.42947040595e-08     | 2.75824280415e-05   |
| PF14551.1 MCM N-terminal domain          | 6                                            | 492                                             | 1                                     | 7332                                     | 4.4932843617   | 4.25807597249e-07     | 9.13357296099e-05   |
| PF00067.17 Cytochrome P450               | 15                                           | 483                                             | 44                                    | 7289                                     | 1.63796555491  | 2.68381670695e-06     | 0.000383785789093   |
| PF07690.11 Major Facilitator Superfamily | 17                                           | 481                                             | 91                                    | 7242                                     | 1.03413925776  | 0.000427661867086     | 0.045866735245      |

| SSP Annotation term           | # up-regulated proteins with annotation term | # up-regulated proteins without annotation term | # other proteins with annotation term | # other proteins without annotation term | log odds ratio | p-value (uncorrected) | p-value (corrected) |
|-------------------------------|----------------------------------------------|-------------------------------------------------|---------------------------------------|------------------------------------------|----------------|-----------------------|---------------------|
| SSP<br>Small Secreted Protein | 28                                           | 470                                             | 270                                   | 7063                                     | 0.443675025882 | 0.0383881417996       | 0.0383881417996     |

| Secretome Annotation term                  | # up-regulated proteins with annotation term | # up-regulated proteins without annotation term | # other proteins with annotation term | # other proteins without annotation term | log odds ratio | p-value (uncorrected) | p-value (corrected) |
|--------------------------------------------|----------------------------------------------|-------------------------------------------------|---------------------------------------|------------------------------------------|----------------|-----------------------|---------------------|
| secretome<br>Has a SignalP signal sequence | 86                                           | 412                                             | 805                                   | 6528                                     | 0.526337566129 | 5.46630410752e-05     | 5.46630410752e-05   |

| TMHMM Annotation term                     | # up-regulated proteins with annotation term | # up-regulated proteins without annotation term | # other proteins with annotation term | # other proteins without annotation term | log odds ratio | p-value (uncorrected) | p-value (corrected) |
|-------------------------------------------|----------------------------------------------|-------------------------------------------------|---------------------------------------|------------------------------------------|----------------|-----------------------|---------------------|
| TMHMM<br>Has transmembrane domain (TMHMM) | 118                                          | 380                                             | 1375                                  | 5958                                     | 0.296794494918 | 0.00792095738226      | 0.00792095738226    |

| <b>KEGG Annotation term</b>               | <b># up-regulated proteins with annotation term</b> | <b># up-regulated proteins without annotation term</b> | <b># other proteins with annotation term</b> | <b># other proteins without annotation term</b> | <b>log odds ratio</b> | <b>p-value (uncorrected)</b> | <b>p-value (corrected)</b> |
|-------------------------------------------|-----------------------------------------------------|--------------------------------------------------------|----------------------------------------------|-------------------------------------------------|-----------------------|------------------------------|----------------------------|
| KEGG third level: DNA replication         | 14                                                  | 484                                                    | 18                                           | 7315                                            | 2.46428297846         | 2.40713312015e-09            | 7.51025533485e-07          |
| KEGG EC: EC:3.6.4.12                      | 6                                                   | 492                                                    | 7                                            | 7326                                            | 2.54655554702         | 7.4962482681e-05             | 0.00477505086669           |
| KEGG second level: Replication and repair | 18                                                  | 480                                                    | 79                                           | 7254                                            | 1.23644612137         | 3.2320513966e-05             | 0.00477505086669           |

| <b>Secondary Metabolism Annotation term</b>                                                                                   | <b># up-regulated proteins with annotation term</b> | <b># up-regulated proteins without annotation term</b> | <b># other proteins with annotation term</b> | <b># other proteins without annotation term</b> | <b>log odds ratio</b> | <b>p-value (uncorrected)</b> | <b>p-value (corrected)</b> |
|-------------------------------------------------------------------------------------------------------------------------------|-----------------------------------------------------|--------------------------------------------------------|----------------------------------------------|-------------------------------------------------|-----------------------|------------------------------|----------------------------|
| Present in secondary metabolism cluster<br>Backbone genes, decorating genes, and other genes in secondary metabolism clusters | 20                                                  | 478                                                    | 107                                          | 7226                                            | 1.03873361831         | 0.000135728904546            | 0.00271457809091           |
| Backbone genes and decorating genes<br>Backbone genes and decorating genes in secondary metabolism clusters                   | 13                                                  | 485                                                    | 64                                           | 7269                                            | 1.11329139265         | 0.00102022350861             | 0.00680149005739           |
| Cluster 2<br>Part of secondary metabolism cluster 2                                                                           | 4                                                   | 494                                                    | 4                                            | 7329                                            | 2.69705884274         | 0.00092071262013             | 0.00680149005739           |

**Table 8:** Overrepresentation of annotation terms within the total of 135 *Ophiocordyceps unilateralis* genes that are down-regulated in live manipulated *Camponotus castaneus* ant heads (Manipulated Biting Behavior samples) compared to gene expression in culture (Fungal Baseline Expression samples) and up-regulated again after manipulation (Death After Manipulation samples) (2-fold and significant  $Q < 0.05$ , minimum expression of 4)

| Go Annotation term                        | # down-regulated proteins with annotation term | # down-regulated proteins without annotation term | # other proteins with annotation term | # other proteins without annotation term | log odds ratio | p-value (uncorrected) | p-value (corrected) |
|-------------------------------------------|------------------------------------------------|---------------------------------------------------|---------------------------------------|------------------------------------------|----------------|-----------------------|---------------------|
| GO:0005975 carbohydrate metabolic process | 12                                             | 123                                               | 146                                   | 7550                                     | 1.618418515    | 1.63E-05              | 0.014498189         |

| Secretome Annotation term                  | # down-regulated proteins with annotation term | # down-regulated proteins without annotation term | # other proteins with annotation term | # other proteins without annotation term | log odds ratio | p-value (uncorrected) | p-value (corrected) |
|--------------------------------------------|------------------------------------------------|---------------------------------------------------|---------------------------------------|------------------------------------------|----------------|-----------------------|---------------------|
| secretome<br>Has a SignalP signal sequence | 28                                             | 107                                               | 863                                   | 6833                                     | 0.728480079    | 0.001436723           | 0.001436723         |
