# Supplementary material for: Gene expression during zombie ant biting behavior reflects the complexity underlying fungal parasitic behavioral manipulation
Source: PubMed Central journal article supplement (PMC4545319; doi:10.1186/s12864-015-1812-x), 2015-08-19

Gene Z-score

Fungal culture

During manipulated biting

After manipulation

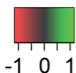

-1 0 1

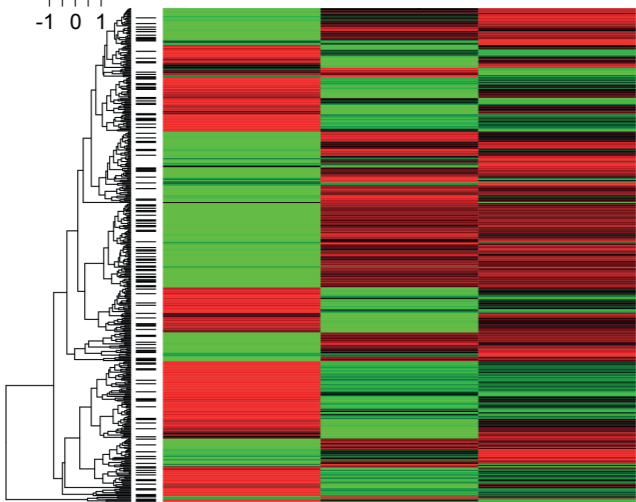

Supplement: 12864_2015_1812_MOESM9_ESM.pdf [file 12864_2015_1812_MOESM9_ESM.pdf]
