# Supplementary material for: Gene expression during zombie ant biting behavior reflects the complexity underlying fungal parasitic behavioral manipulation
Source: PubMed Central journal article supplement (PMC4545319; doi:10.1186/s12864-015-1812-x), 2015-08-19
Supplement: 12864_2015_1812_MOESM11_ESM.pdf [file 12864_2015_1812_MOESM11_ESM.pdf]

## Healthy Ants at 2PM vs Healthy Ants at 10AM

**Table 1:** Overrepresentation of annotation terms within the total of 77 up-regulated *Camponotus floridanus* homologs (2-fold and significant  $Q < 0.05$ , minimum expression of 4) in healthy *Camponotus castaneus* ant heads at 10 AM (Ant Controls at 10AM samples) compared to gene expression at 2 PM (Ant Controls at 2PM samples)

| PFAM Annotation term                                | # up-regulated proteins with annotation term | # up-regulated proteins without annotation term | # other proteins with annotation term | # other proteins without annotation term | log odds ratio | p-value (uncorrected) | p-value (corrected) |
|-----------------------------------------------------|----------------------------------------------|-------------------------------------------------|---------------------------------------|------------------------------------------|----------------|-----------------------|---------------------|
| PF00650.15 CRAL/TRIO domain                         | 4                                            | 73                                              | 21                                    | 16963                                    | 3.790102263    | 4.51E-06              | 0.003399132         |
| PF03392.8 Insect pheromone-binding family, A10/OS-D | 3                                            | 74                                              | 9                                     | 16975                                    | 4.336819571    | 1.89E-05              | 0.007110284         |
| PF01401.13 Angiotensin-converting enzyme            | 2                                            | 75                                              | 4                                     | 16980                                    | 4.729156166    | 0.000298068           | 0.037407538         |
| PF00917.21 MATH domain                              | 2                                            | 75                                              | 4                                     | 16980                                    | 4.729156166    | 0.000298068           | 0.037407538         |
| PF07690.11 Major Facilitator Superfamily            | 5                                            | 72                                              | 116                                   | 16868                                    | 2.312355217    | 0.000217057           | 0.037407538         |
| PF03765.10 CRAL/TRIO, N-terminal domain             | 2                                            | 75                                              | 4                                     | 16980                                    | 4.729156166    | 0.000298068           | 0.037407538         |

  

| SSP Annotation term           | # up-regulated proteins with annotation term | # up-regulated proteins without annotation term | # other proteins with annotation term | # other proteins without annotation term | log odds ratio | p-value (uncorrected) | p-value (corrected) |
|-------------------------------|----------------------------------------------|-------------------------------------------------|---------------------------------------|------------------------------------------|----------------|-----------------------|---------------------|
| SSP<br>Small Secreted Protein | 6                                            | 71                                              | 305                                   | 16679                                    | 1.530673538    | 0.002801902           | 0.002801902         |

  

| Secretome Annotation term                  | # up-regulated proteins with annotation term | # up-regulated proteins without annotation term | # other proteins with annotation term | # other proteins without annotation term | log odds ratio | p-value (uncorrected) | p-value (corrected) |
|--------------------------------------------|----------------------------------------------|-------------------------------------------------|---------------------------------------|------------------------------------------|----------------|-----------------------|---------------------|
| secretome<br>Has a SignalP signal sequence | 15                                           | 62                                              | 928                                   | 16056                                    | 1.431721974    | 1.72E-05              | 1.72E-05            |

**Table 2:** Overrepresentation of annotation terms within the total of 54 down-regulated *Camponotus floridanus* homologs (2-fold and significant  $Q < 0.05$ , minimum expression of 4) in healthy *Camponotus castaneus* ant heads at 10 AM (Ant Controls at 10AM samples) compared to gene expression at 2 PM (Ant Controls at 2PM samples)

| GO Annotation term                                                  | # down-regulated proteins with annotation term | # down-regulated proteins without annotation term | # other proteins with annotation term | # other proteins without annotation term | log odds ratio | p-value (uncorrected) | p-value (corrected) |
|---------------------------------------------------------------------|------------------------------------------------|---------------------------------------------------|---------------------------------------|------------------------------------------|----------------|-----------------------|---------------------|
| GO:0055086 nucleobase-containing small molecule metabolic process   | 6                                              | 48                                                | 94                                    | 16913                                    | 3.113101512    | 7.17E-07              | 0.000408634         |
| GO:0044281 small molecule metabolic process                         | 8                                              | 46                                                | 210                                   | 16797                                    | 2.632648192    | 3.92E-07              | 0.000408634         |
| GO:1901564 organonitrogen compound metabolic process                | 8                                              | 46                                                | 257                                   | 16750                                    | 2.427877598    | 1.71E-06              | 0.000649606         |
| GO:0072521 purine-containing compound metabolic process             | 4                                              | 50                                                | 55                                    | 16952                                    | 3.20507927     | 3.59E-05              | 0.010217626         |
| GO:1901135 carbohydrate derivative metabolic process                | 5                                              | 49                                                | 152                                   | 16855                                    | 2.426139721    | 0.000136098           | 0.020708731         |
| GO:0044710 single-organism metabolic process                        | 11                                             | 43                                                | 911                                   | 16096                                    | 1.508478333    | 0.000121765           | 0.020708731         |
| GO:0044711 single-organism biosynthetic process                     | 5                                              | 49                                                | 162                                   | 16845                                    | 2.361830435    | 0.000181656           | 0.020708731         |
| GO:0016742 hydroxymethyl-, formyl- and related transferase activity | 2                                              | 52                                                | 3                                     | 17004                                    | 5.384495063    | 9.77E-05              | 0.020708731         |
| GO:0006753 nucleoside phosphate metabolic process                   | 4                                              | 50                                                | 84                                    | 16923                                    | 2.779883479    | 0.000171639           | 0.020708731         |
| GO:0009117 nucleotide metabolic process                             | 4                                              | 50                                                | 83                                    | 16924                                    | 2.79191876     | 0.000164221           | 0.020708731         |
| GO:0072522 purine-containing compound biosynthetic process          | 3                                              | 51                                                | 36                                    | 16971                                    | 3.322529002    | 0.000252698           | 0.024006266         |
| GO:0016741 transferase activity, transferring one-carbon groups     | 4                                              | 50                                                | 92                                    | 16915                                    | 2.68843886     | 0.000239985           | 0.024006266         |
| GO:0008484 sulfuric ester hydrolase activity                        | 2                                              | 52                                                | 7                                     | 17000                                    | 4.536961936    | 0.000348986           | 0.030603412         |
| GO:0006807 nitrogen compound metabolic process                      | 9                                              | 45                                                | 739                                   | 16268                                    | 1.482219434    | 0.000515393           | 0.041967712         |
| GO:1901293 nucleoside phosphate biosynthetic process                | 3                                              | 51                                                | 54                                    | 16953                                    | 2.916002698    | 0.00077716            | 0.042076237         |
| GO:0006139 nucleobase-containing compound metabolic process         | 8                                              | 46                                                | 600                                   | 16407                                    | 1.559333842    | 0.000607937           | 0.042076237         |
| GO:0006163 purine nucleotide metabolic process                      | 3                                              | 51                                                | 54                                    | 16953                                    | 2.916002698    | 0.00077716            | 0.042076237         |
| GO:0046483 heterocycle metabolic process                            | 8                                              | 46                                                | 631                                   | 16376                                    | 1.50706641     | 0.000841297           | 0.042076237         |
| GO:0008152 metabolic process                                        | 18                                             | 36                                                | 2496                                  | 14511                                    | 1.067070351    | 0.000658862           | 0.042076237         |

| <b>GO Annotation term</b>                               | <b># down-regulated proteins with annotation term</b> | <b># down-regulated proteins without annotation term</b> | <b># other proteins with annotation term</b> | <b># other proteins without annotation term</b> | <b>log odds ratio</b> | <b>p-value (uncorrected)</b> | <b>p-value (corrected)</b> |
|---------------------------------------------------------|-------------------------------------------------------|----------------------------------------------------------|----------------------------------------------|-------------------------------------------------|-----------------------|------------------------------|----------------------------|
| GO:0019637 organophosphate metabolic process            | 4                                                     | 50                                                       | 130                                          | 16877                                           | 2.340443932           | 0.000848907                  | 0.042076237                |
| GO:0034641 cellular nitrogen compound metabolic process | 8                                                     | 46                                                       | 631                                          | 16376                                           | 1.50706641            | 0.000841297                  | 0.042076237                |
| GO:0009165 nucleotide biosynthetic process              | 3                                                     | 51                                                       | 54                                           | 16953                                           | 2.916002698           | 0.000777716                  | 0.042076237                |
| GO:0006725 cellular aromatic compound metabolic process | 8                                                     | 46                                                       | 618                                          | 16389                                           | 1.528677345           | 0.000735934                  | 0.042076237                |
| GO:1901657 glycosyl compound metabolic process          | 3                                                     | 51                                                       | 59                                           | 16948                                           | 2.827154324           | 0.000993371                  | 0.045297734                |
| GO:0009116 nucleoside metabolic process                 | 3                                                     | 51                                                       | 59                                           | 16948                                           | 2.827154324           | 0.000993371                  | 0.045297734                |
| GO:1901360 organic cyclic compound metabolic process    | 8                                                     | 46                                                       | 652                                          | 16355                                           | 1.473044523           | 0.001036977                  | 0.045467466                |
| GO:0019438 aromatic compound biosynthetic process       | 4                                                     | 50                                                       | 142                                          | 16865                                           | 2.251440046           | 0.0011677                    | 0.049302883                |

| <b>SSP Annotation term</b>    | <b># down-regulated proteins with annotation term</b> | <b># down-regulated proteins without annotation term</b> | <b># other proteins with annotation term</b> | <b># other proteins without annotation term</b> | <b>log odds ratio</b> | <b>p-value (uncorrected)</b> | <b>p-value (corrected)</b> |
|-------------------------------|-------------------------------------------------------|----------------------------------------------------------|----------------------------------------------|-------------------------------------------------|-----------------------|------------------------------|----------------------------|
| SSP<br>Small Secreted Protein | 5                                                     | 49                                                       | 306                                          | 16701                                           | 1.717256389           | 0.002969093                  | 0.002969093                |

## Healthy Ants at 2PM vs Death After Manipulated Biting Behavior

**Table 3:** Overrepresentation of annotation terms within the total of 581 up-regulated *Camponotus floridanus* homologs (2-fold and significant  $Q < 0.05$ , minimum expression of 4) in dead *Camponotus castaneus* ant heads after manipulation (Death After Manipulation samples) compared to gene expression in healthy *Camponotus castaneus* ant heads at the same time of day; 2 PM (Ant Controls at 2PM samples)

| GO Annotation term                                                     | # up-regulated proteins with annotation term | # up-regulated proteins without annotation term | # other proteins with annotation term | # other proteins without annotation term | log odds ratio | p-value (uncorrected) | p-value (corrected) |
|------------------------------------------------------------------------|----------------------------------------------|-------------------------------------------------|---------------------------------------|------------------------------------------|----------------|-----------------------|---------------------|
| <b>Over-represented</b>                                                |                                              |                                                 |                                       |                                          |                |                       |                     |
| GO:0003674 molecular_function                                          | 300                                          | 281                                             | 6002                                  | 10478                                    | 0.622612879    | 2.60E-13              | 2.96E-10            |
| GO:0005488 binding                                                     | 213                                          | 368                                             | 4115                                  | 12365                                    | 0.553440294    | 1.05E-09              | 3.98E-07            |
| GO:0065007 biological regulation                                       | 66                                           | 515                                             | 804                                   | 15676                                    | 0.915774732    | 9.95E-10              | 3.98E-07            |
| GO:0005515 protein binding                                             | 97                                           | 484                                             | 1459                                  | 15021                                    | 0.724324024    | 4.33E-09              | 8.23E-07            |
| GO:0050789 regulation of biological process                            | 63                                           | 518                                             | 779                                   | 15701                                    | 0.896628122    | 3.90E-09              | 8.23E-07            |
| GO:0050794 regulation of cellular process                              | 63                                           | 518                                             | 771                                   | 15709                                    | 0.907460186    | 3.03E-09              | 8.23E-07            |
| GO:0007165 signal transduction                                         | 35                                           | 546                                             | 360                                   | 16120                                    | 1.05444107     | 2.54E-07              | 4.14E-05            |
| GO:0006793 phosphorus metabolic process                                | 35                                           | 546                                             | 384                                   | 16096                                    | 0.988412606    | 1.43E-06              | 0.000181379         |
| GO:0006796 phosphate-containing compound metabolic process             | 35                                           | 546                                             | 382                                   | 16098                                    | 0.993758797    | 1.36E-06              | 0.000181379         |
| GO:0003700 sequence-specific DNA binding transcription factor activity | 22                                           | 559                                             | 182                                   | 16298                                    | 1.259683973    | 1.88E-06              | 0.000194637         |
| GO:0001071 nucleic acid binding transcription factor activity          | 22                                           | 559                                             | 182                                   | 16298                                    | 1.259683973    | 1.88E-06              | 0.000194637         |
| GO:0051716 cellular response to stimulus                               | 37                                           | 544                                             | 446                                   | 16034                                    | 0.89411646     | 4.68E-06              | 0.000445051         |
| GO:0043167 ion binding                                                 | 100                                          | 481                                             | 1793                                  | 14687                                    | 0.53237547     | 8.00E-06              | 0.000701855         |
| GO:0050896 response to stimulus                                        | 38                                           | 543                                             | 483                                   | 15997                                    | 0.84061667     | 1.12E-05              | 0.000910377         |
| GO:0036211 protein modification process                                | 30                                           | 551                                             | 344                                   | 16136                                    | 0.937628995    | 1.54E-05              | 0.001097849         |
| GO:0006464 cellular protein modification process                       | 30                                           | 551                                             | 344                                   | 16136                                    | 0.937628995    | 1.54E-05              | 0.001097849         |
| GO:0043412 macromolecule modification                                  | 31                                           | 550                                             | 369                                   | 16111                                    | 0.90052983     | 1.98E-05              | 0.00132576          |
| GO:0051171 regulation of nitrogen compound metabolic process           | 28                                           | 553                                             | 316                                   | 16164                                    | 0.951646121    | 2.57E-05              | 0.001505275         |

| GO Annotation term                                                        | # up-regulated proteins with annotation term | # up-regulated proteins without annotation term | # other proteins with annotation term | # other proteins without annotation term | log odds ratio | p-value (uncorrected) | p-value (corrected) |
|---------------------------------------------------------------------------|----------------------------------------------|-------------------------------------------------|---------------------------------------|------------------------------------------|----------------|-----------------------|---------------------|
| GO:0019219 regulation of nucleobase-containing compound metabolic process | 28                                           | 553                                             | 316                                   | 16164                                    | 0.951646121    | 2.57E-05              | 0.001505275         |
| GO:0016310 phosphorylation                                                | 23                                           | 558                                             | 235                                   | 16245                                    | 1.047090188    | 2.64E-05              | 0.001505275         |
| GO:0080090 regulation of primary metabolic process                        | 28                                           | 553                                             | 324                                   | 16156                                    | 0.92614977     | 3.45E-05              | 0.001870457         |
| GO:0031323 regulation of cellular metabolic process                       | 28                                           | 553                                             | 327                                   | 16153                                    | 0.916747408    | 3.89E-05              | 0.001976197         |
| GO:0006468 protein phosphorylation                                        | 22                                           | 559                                             | 225                                   | 16255                                    | 1.044948411    | 3.99E-05              | 0.001976197         |
| GO:0019222 regulation of metabolic process                                | 28                                           | 553                                             | 333                                   | 16147                                    | 0.898193572    | 5.02E-05              | 0.002386647         |
| GO:0004672 protein kinase activity                                        | 22                                           | 559                                             | 231                                   | 16249                                    | 1.018261917    | 5.72E-05              | 0.002577603         |
| GO:0046872 metal ion binding                                              | 58                                           | 523                                             | 930                                   | 15550                                    | 0.617492878    | 5.88E-05              | 0.002577603         |
| GO:2001141 regulation of RNA biosynthetic process                         | 25                                           | 556                                             | 282                                   | 16198                                    | 0.948843516    | 7.60E-05              | 0.002988165         |
| GO:0051252 regulation of RNA metabolic process                            | 25                                           | 556                                             | 282                                   | 16198                                    | 0.948843516    | 7.60E-05              | 0.002988165         |
| GO:0006355 regulation of transcription, DNA-templated                     | 25                                           | 556                                             | 282                                   | 16198                                    | 0.948843516    | 7.60E-05              | 0.002988165         |
| GO:0010556 regulation of macromolecule biosynthetic process               | 25                                           | 556                                             | 289                                   | 16191                                    | 0.923891654    | 9.51E-05              | 0.003011545         |
| GO:0006470 protein dephosphorylation                                      | 7                                            | 574                                             | 25                                    | 16455                                    | 2.082789589    | 8.21E-05              | 0.003011545         |
| GO:2000112 regulation of cellular macromolecule biosynthetic process      | 25                                           | 556                                             | 289                                   | 16191                                    | 0.923891654    | 9.51E-05              | 0.003011545         |
| GO:0010468 regulation of gene expression                                  | 25                                           | 556                                             | 289                                   | 16191                                    | 0.923891654    | 9.51E-05              | 0.003011545         |
| GO:0009889 regulation of biosynthetic process                             | 25                                           | 556                                             | 289                                   | 16191                                    | 0.923891654    | 9.51E-05              | 0.003011545         |
| GO:0016020 membrane                                                       | 40                                           | 541                                             | 566                                   | 15914                                    | 0.731820601    | 8.04E-05              | 0.003011545         |
| GO:0031326 regulation of cellular biosynthetic process                    | 25                                           | 556                                             | 289                                   | 16191                                    | 0.923891654    | 9.51E-05              | 0.003011545         |
| GO:0043169 cation binding                                                 | 58                                           | 523                                             | 948                                   | 15532                                    | 0.597164735    | 0.000100207           | 0.003087445         |
| GO:0004721 phosphoprotein phosphatase activity                            | 7                                            | 574                                             | 27                                    | 16453                                    | 2.005706997    | 0.00012368            | 0.003615268         |
| GO:0060255 regulation of macromolecule metabolic process                  | 25                                           | 556                                             | 299                                   | 16181                                    | 0.889256951    | 0.000140394           | 0.00400124          |
| GO:0004725 protein tyrosine phosphatase activity                          | 6                                            | 575                                             | 19                                    | 16461                                    | 2.201699675    | 0.000154781           | 0.004303654         |
| GO:0008150 biological_process                                             | 184                                          | 397                                             | 4060                                  | 12420                                    | 0.34912458     | 0.00016607            | 0.004507602         |
| GO:0043565 sequence-specific DNA binding                                  | 17                                           | 564                                             | 170                                   | 16310                                    | 1.061894351    | 0.000229955           | 0.005957921         |

| GO Annotation term                                                | # up-regulated proteins with annotation term | # up-regulated proteins without annotation term | # other proteins with annotation term | # other proteins without annotation term | log odds ratio | p-value (uncorrected) | p-value (corrected) |
|-------------------------------------------------------------------|----------------------------------------------|-------------------------------------------------|---------------------------------------|------------------------------------------|----------------|-----------------------|---------------------|
| GO:0009987 cellular process                                       | 109                                          | 472                                             | 2185                                  | 14295                                    | 0.412662894    | 0.000250437           | 0.006344406         |
| GO:0016311 dephosphorylation                                      | 7                                            | 574                                             | 31                                    | 16449                                    | 1.867313512    | 0.000257864           | 0.006390537         |
| GO:0005575 cellular_component                                     | 106                                          | 475                                             | 2120                                  | 14360                                    | 0.413154765    | 0.000270644           | 0.00656455          |
| GO:0016773 phosphotransferase activity, alcohol group as acceptor | 23                                           | 558                                             | 285                                   | 16195                                    | 0.851103905    | 0.000398331           | 0.009460357         |
| GO:0005509 calcium ion binding                                    | 13                                           | 568                                             | 115                                   | 16365                                    | 1.180795997    | 0.000426716           | 0.009927668         |
| GO:0006811 ion transport                                          | 17                                           | 564                                             | 184                                   | 16296                                    | 0.981898293    | 0.000534317           | 0.012090622         |
| GO:0044765 single-organism transport                              | 30                                           | 551                                             | 424                                   | 16056                                    | 0.723567008    | 0.000540896           | 0.012090622         |
| GO:0022838 substrate-specific channel activity                    | 11                                           | 570                                             | 90                                    | 16390                                    | 1.256875913    | 0.000644986           | 0.013368804         |
| GO:0022803 passive transmembrane transporter activity             | 11                                           | 570                                             | 90                                    | 16390                                    | 1.256875913    | 0.000644986           | 0.013368804         |
| GO:0015267 channel activity                                       | 11                                           | 570                                             | 90                                    | 16390                                    | 1.256875913    | 0.000644986           | 0.013368804         |
| GO:0005216 ion channel activity                                   | 11                                           | 570                                             | 90                                    | 16390                                    | 1.256875913    | 0.000644986           | 0.013368804         |
| GO:0016301 kinase activity                                        | 22                                           | 559                                             | 277                                   | 16203                                    | 0.833827163    | 0.000951108           | 0.019022159         |
| GO:0006810 transport                                              | 36                                           | 545                                             | 564                                   | 15916                                    | 0.622759064    | 0.001163246           | 0.022476278         |
| GO:0051234 establishment of localization                          | 36                                           | 545                                             | 566                                   | 15914                                    | 0.61909357     | 0.001189083           | 0.022592586         |
| GO:0016791 phosphatase activity                                   | 8                                            | 573                                             | 56                                    | 16424                                    | 1.409703093    | 0.001423183           | 0.026597182         |
| GO:0055085 transmembrane transport                                | 21                                           | 560                                             | 273                                   | 16207                                    | 0.800312385    | 0.00157278            | 0.028918857         |
| GO:0006461 protein complex assembly                               | 6                                            | 575                                             | 33                                    | 16447                                    | 1.648780236    | 0.001903759           | 0.034448974         |

| <b>PFAM Annotation term</b>                                        | <b># up-regulated proteins with annotation term</b> | <b># up-regulated proteins without annotation term</b> | <b># other proteins with annotation term</b> | <b># other proteins without annotation term</b> | <b>log odds ratio</b> | <b>p-value (uncorrected)</b> | <b>p-value (corrected)</b> |
|--------------------------------------------------------------------|-----------------------------------------------------|--------------------------------------------------------|----------------------------------------------|-------------------------------------------------|-----------------------|------------------------------|----------------------------|
| PF00069.20 Protein kinase domain                                   | 21                                                  | 560                                                    | 216                                          | 16264                                           | 1.038016602           | 6.40E-05                     | 0.016065116                |
| PF13895.1 Immunoglobulin domain                                    | 13                                                  | 568                                                    | 93                                           | 16387                                           | 1.394472062           | 6.33E-05                     | 0.016065116                |
| PF07714.12 Protein tyrosine kinase                                 | 21                                                  | 560                                                    | 213                                          | 16267                                           | 1.052187283           | 5.32E-05                     | 0.016065116                |
| PF14259.1 RNA recognition motif (a.k.a. RRM, RBD, or RNP domain)   | 11                                                  | 570                                                    | 80                                           | 16400                                           | 1.375268891           | 0.000260676                  | 0.024536104                |
| PF00102.22 Protein-tyrosine phosphatase                            | 6                                                   | 575                                                    | 19                                           | 16461                                           | 2.201699675           | 0.000154781                  | 0.024536104                |
| PF13306.1 Leucine rich repeats (6 copies)                          | 7                                                   | 574                                                    | 31                                           | 16449                                           | 1.867313512           | 0.000257864                  | 0.024536104                |
| PF00036.27 EF hand                                                 | 6                                                   | 575                                                    | 20                                           | 16460                                           | 2.150345629           | 0.000195466                  | 0.024536104                |
| PF00076.17 RNA recognition motif. (a.k.a. RRM, RBD, or RNP domain) | 12                                                  | 569                                                    | 93                                           | 16387                                           | 1.312670339           | 0.000236687                  | 0.024536104                |
| PF07716.10 Basic region leucine zipper                             | 5                                                   | 576                                                    | 14                                           | 16466                                           | 2.32332585            | 0.000351943                  | 0.029445866                |
| PF07647.12 SAM domain (Sterile alpha motif)                        | 5                                                   | 576                                                    | 15                                           | 16465                                           | 2.254272245           | 0.000456201                  | 0.034109821                |
| PF07679.11 Immunoglobulin I-set domain                             | 11                                                  | 570                                                    | 87                                           | 16393                                           | 1.290960487           | 0.000498284                  | 0.034109821                |
| PF00105.13 Zinc finger, C4 type (two domains)                      | 5                                                   | 576                                                    | 16                                           | 16464                                           | 2.189672988           | 0.000582118                  | 0.036527901                |

| <b>Secretome Annotation term</b>           | <b># up-regulated proteins with annotation term</b> | <b># up-regulated proteins without annotation term</b> | <b># other proteins with annotation term</b> | <b># other proteins without annotation term</b> | <b>log odds ratio</b> | <b>p-value (uncorrected)</b> | <b>p-value (corrected)</b> |
|--------------------------------------------|-----------------------------------------------------|--------------------------------------------------------|----------------------------------------------|-------------------------------------------------|-----------------------|------------------------------|----------------------------|
| secretome<br>Has a SignalP signal sequence | 48                                                  | 533                                                    | 895                                          | 15585                                           | 0.449920061           | 0.00536912                   | 0.00536912                 |

**Table 4:** Overrepresentation of annotation terms within the total of 565 down-regulated *Camponotus floridanus* homologs (2-fold and significant  $Q < 0.05$ , minimum expression of 4) in dead *Camponotus castaneus* ant heads after manipulation (Death After Manipulation samples) compared to gene expression in healthy *Camponotus castaneus* ant heads at the same time of day; 2 PM (Ant Controls at 2PM samples)

| GO Annotation term                                                                                               | # down-regulated proteins with annotation term | # down-regulated proteins without annotation term | # other proteins with annotation term | # other proteins without annotation term | log odds ratio | p-value (uncorrected) | p-value (corrected) |
|------------------------------------------------------------------------------------------------------------------|------------------------------------------------|---------------------------------------------------|---------------------------------------|------------------------------------------|----------------|-----------------------|---------------------|
| GO:0008152 metabolic process                                                                                     | 240                                            | 325                                               | 2274                                  | 14222                                    | 1.530063407    | 1.72E-59              | 1.96E-56            |
| GO:0008150 biological_process                                                                                    | 318                                            | 247                                               | 3926                                  | 12570                                    | 1.416354973    | 6.03E-59              | 3.44E-56            |
| GO:0003824 catalytic activity                                                                                    | 245                                            | 320                                               | 2519                                  | 13977                                    | 1.446488339    | 1.07E-54              | 4.07E-52            |
| GO:0003674 molecular_function                                                                                    | 361                                            | 204                                               | 5941                                  | 10555                                    | 1.145480176    | 9.73E-40              | 2.77E-37            |
| GO:0016491 oxidoreductase activity                                                                               | 90                                             | 475                                               | 440                                   | 16056                                    | 1.93355803     | 5.62E-39              | 1.28E-36            |
| GO:0044699 single-organism process                                                                               | 160                                            | 405                                               | 1593                                  | 14903                                    | 1.307230252    | 1.81E-34              | 3.44E-32            |
| GO:0044710 single-organism metabolic process                                                                     | 106                                            | 459                                               | 816                                   | 15680                                    | 1.490115823    | 2.03E-30              | 3.31E-28            |
| GO:0055114 oxidation-reduction process                                                                           | 69                                             | 496                                               | 359                                   | 16137                                    | 1.83307824     | 1.93E-28              | 2.75E-26            |
| GO:0044238 primary metabolic process                                                                             | 128                                            | 437                                               | 1618                                  | 14878                                    | 0.990789862    | 1.70E-18              | 2.15E-16            |
| GO:0071704 organic substance metabolic process                                                                   | 131                                            | 434                                               | 1704                                  | 14792                                    | 0.963260855    | 5.69E-18              | 6.49E-16            |
| GO:0048037 cofactor binding                                                                                      | 32                                             | 533                                               | 135                                   | 16361                                    | 1.984595433    | 6.06E-16              | 6.28E-14            |
| GO:0050662 coenzyme binding                                                                                      | 26                                             | 539                                               | 99                                    | 16397                                    | 2.078114787    | 4.40E-14              | 4.18E-12            |
| GO:0005975 carbohydrate metabolic process                                                                        | 30                                             | 535                                               | 153                                   | 16343                                    | 1.790047663    | 3.75E-13              | 3.29E-11            |
| GO:0044281 small molecule metabolic process                                                                      | 32                                             | 533                                               | 186                                   | 16310                                    | 1.661001501    | 1.38E-12              | 1.13E-10            |
| GO:0044763 single-organism cellular process                                                                      | 75                                             | 490                                               | 903                                   | 15593                                    | 0.971937544    | 8.42E-12              | 6.40E-10            |
| GO:1901564 organonitrogen compound metabolic process                                                             | 33                                             | 532                                               | 232                                   | 16264                                    | 1.469836056    | 5.95E-11              | 4.24E-09            |
| GO:0005506 iron ion binding                                                                                      | 25                                             | 540                                               | 132                                   | 16364                                    | 1.747343842    | 6.76E-11              | 4.53E-09            |
| GO:0016705 oxidoreductase activity, acting on paired donors, with incorporation or reduction of molecular oxygen | 25                                             | 540                                               | 135                                   | 16361                                    | 1.72468764     | 1.03E-10              | 6.52E-09            |
| GO:0043167 ion binding                                                                                           | 114                                            | 451                                               | 1779                                  | 14717                                    | 0.737682988    | 1.43E-10              | 8.58E-09            |
| GO:1901605 alpha-amino acid metabolic process                                                                    | 12                                             | 553                                               | 20                                    | 16476                                    | 2.88347643     | 1.91E-10              | 1.09E-08            |



| GO Annotation term                                                  | # down-regulated proteins with annotation term | # down-regulated proteins without annotation term | # other proteins with annotation term | # other proteins without annotation term | log odds ratio | p-value (uncorrected) | p-value (corrected) |
|---------------------------------------------------------------------|------------------------------------------------|---------------------------------------------------|---------------------------------------|------------------------------------------|----------------|-----------------------|---------------------|
| GO:0020037 heme binding                                             | 25                                             | 540                                               | 143                                   | 16353                                    | 1.666628701    | 3.00E-10              | 1.56E-08            |
| GO:0046906 tetrapyrrole binding                                     | 25                                             | 540                                               | 143                                   | 16353                                    | 1.666628701    | 3.00E-10              | 1.56E-08            |
| GO:0043436 oxoacid metabolic process                                | 20                                             | 545                                               | 89                                    | 16407                                    | 1.911773461    | 4.16E-10              | 1.90E-08            |
| GO:0006082 organic acid metabolic process                           | 20                                             | 545                                               | 89                                    | 16407                                    | 1.911773461    | 4.16E-10              | 1.90E-08            |
| GO:0019752 carboxylic acid metabolic process                        | 20                                             | 545                                               | 89                                    | 16407                                    | 1.911773461    | 4.16E-10              | 1.90E-08            |
| GO:0006520 cellular amino acid metabolic process                    | 18                                             | 547                                               | 72                                    | 16424                                    | 2.015755795    | 7.25E-10              | 3.18E-08            |
| GO:0044282 small molecule catabolic process                         | 9                                              | 556                                               | 8                                     | 16488                                    | 3.507402864    | 8.63E-10              | 3.64E-08            |
| GO:0050660 flavin adenine dinucleotide binding                      | 14                                             | 551                                               | 39                                    | 16457                                    | 2.372267072    | 1.19E-09              | 4.84E-08            |
| GO:0044765 single-organism transport                                | 42                                             | 523                                               | 412                                   | 16084                                    | 1.142645073    | 1.95E-09              | 7.65E-08            |
| GO:0009987 cellular process                                         | 126                                            | 439                                               | 2168                                  | 14328                                    | 0.640193075    | 5.70E-09              | 2.16E-07            |
| GO:0016021 integral component of membrane                           | 45                                             | 520                                               | 486                                   | 16010                                    | 1.04759386     | 7.87E-09              | 2.89E-07            |
| GO:0016740 transferase activity                                     | 57                                             | 508                                               | 714                                   | 15782                                    | 0.908312187    | 1.24E-08              | 4.42E-07            |
| GO:0016054 organic acid catabolic process                           | 8                                              | 557                                               | 8                                     | 16488                                    | 3.387822883    | 1.40E-08              | 4.70E-07            |
| GO:0046395 carboxylic acid catabolic process                        | 8                                              | 557                                               | 8                                     | 16488                                    | 3.387822883    | 1.40E-08              | 4.70E-07            |
| GO:0009063 cellular amino acid catabolic process                    | 7                                              | 558                                               | 6                                     | 16490                                    | 3.540301133    | 6.07E-08              | 1.98E-06            |
| GO:0044712 single-organism catabolic process                        | 13                                             | 552                                               | 49                                    | 16447                                    | 2.067479382    | 9.42E-08              | 2.98E-06            |
| GO:0016614 oxidoreductase activity, acting on CH-OH group of donors | 14                                             | 551                                               | 62                                    | 16434                                    | 1.907295774    | 1.69E-07              | 5.20E-06            |
| GO:0003995 acyl-CoA dehydrogenase activity                          | 6                                              | 559                                               | 4                                     | 16492                                    | 3.789946329    | 2.41E-07              | 7.23E-06            |
| GO:0006810 transport                                                | 45                                             | 520                                               | 555                                   | 15941                                    | 0.91051525     | 3.11E-07              | 9.09E-06            |
| GO:0051234 establishment of localization                            | 45                                             | 520                                               | 557                                   | 15939                                    | 0.906792653    | 3.37E-07              | 9.62E-06            |
| GO:0044425 membrane part                                            | 46                                             | 519                                               | 591                                   | 15905                                    | 0.8693103      | 7.02E-07              | 1.95E-05            |
| GO:0006629 lipid metabolic process                                  | 19                                             | 546                                               | 135                                   | 16361                                    | 1.439200958    | 8.31E-07              | 2.25E-05            |
| GO:1901606 alpha-amino acid catabolic process                       | 6                                              | 559                                               | 6                                     | 16490                                    | 3.384359942    | 1.00E-06              | 2.65E-05            |
| GO:0055085 transmembrane transport                                  | 27                                             | 538                                               | 267                                   | 16229                                    | 1.115284692    | 1.82E-06              | 4.71E-05            |

| GO Annotation term                                                      | # down-regulated proteins with annotation term | # down-regulated proteins without annotation term | # other proteins with annotation term | # other proteins without annotation term | log odds ratio | p-value (uncorrected) | p-value (corrected) |
|-------------------------------------------------------------------------|------------------------------------------------|---------------------------------------------------|---------------------------------------|------------------------------------------|----------------|-----------------------|---------------------|
| GO:1901565 organonitrogen compound catabolic process                    | 9                                              | 556                                               | 27                                    | 16469                                    | 2.289854522    | 1.90E-06              | 4.82E-05            |
| GO:0044237 cellular metabolic process                                   | 80                                             | 485                                               | 1344                                  | 15152                                    | 0.620360038    | 2.79E-06              | 6.92E-05            |
| GO:0016787 hydrolase activity                                           | 66                                             | 499                                               | 1038                                  | 15458                                    | 0.67787953     | 3.08E-06              | 7.47E-05            |
| GO:0005215 transporter activity                                         | 32                                             | 533                                               | 360                                   | 16136                                    | 0.989918527    | 4.27E-06              | 0.000101397         |
| GO:0016773 phosphotransferase activity, alcohol group as acceptor       | 27                                             | 538                                               | 281                                   | 16215                                    | 1.063315655    | 4.39E-06              | 0.000102112         |
| GO:0016627 oxidoreductase activity, acting on the CH-CH group of donors | 7                                              | 558                                               | 15                                    | 16481                                    | 2.623464467    | 4.65E-06              | 0.00010611          |
| GO:0006544 glycine metabolic process                                    | 5                                              | 560                                               | 5                                     | 16491                                    | 3.382633273    | 8.59E-06              | 0.000192023         |
| GO:0043168 anion binding                                                | 56                                             | 509                                               | 859                                   | 15637                                    | 0.694529932    | 9.56E-06              | 0.000209589         |
| GO:0009069 serine family amino acid metabolic process                   | 5                                              | 560                                               | 6                                     | 16490                                    | 3.200251075    | 1.53E-05              | 0.000329525         |
| GO:0043169 cation binding                                               | 59                                             | 506                                               | 947                                   | 15549                                    | 0.649453288    | 1.70E-05              | 0.000358108         |
| GO:1901363 heterocyclic compound binding                                | 100                                            | 465                                               | 1888                                  | 14608                                    | 0.509184037    | 1.77E-05              | 0.000360541         |
| GO:0097159 organic cyclic compound binding                              | 100                                            | 465                                               | 1888                                  | 14608                                    | 0.509184037    | 1.77E-05              | 0.000360541         |
| GO:0036094 small molecule binding                                       | 54                                             | 511                                               | 839                                   | 15657                                    | 0.67907713     | 1.89E-05              | 0.00037743          |
| GO:0006869 lipid transport                                              | 5                                              | 560                                               | 7                                     | 16489                                    | 3.046039751    | 2.55E-05              | 0.000502142         |
| GO:1901265 nucleoside phosphate binding                                 | 53                                             | 512                                               | 834                                   | 15662                                    | 0.664726561    | 2.90E-05              | 0.000551072         |
| GO:0000166 nucleotide binding                                           | 53                                             | 512                                               | 834                                   | 15662                                    | 0.664726561    | 2.90E-05              | 0.000551072         |
| GO:0009056 catabolic process                                            | 15                                             | 550                                               | 122                                   | 16374                                    | 1.297560868    | 4.92E-05              | 0.000919989         |
| GO:0009071 serine family amino acid catabolic process                   | 4                                              | 561                                               | 4                                     | 16492                                    | 3.380909788    | 7.49E-05              | 0.00135558          |
| GO:0006546 glycine catabolic process                                    | 4                                              | 561                                               | 4                                     | 16492                                    | 3.380909788    | 7.49E-05              | 0.00135558          |
| GO:0022857 transmembrane transporter activity                           | 26                                             | 539                                               | 319                                   | 16177                                    | 0.894535624    | 9.66E-05              | 0.001719991         |
| GO:0005488 binding                                                      | 184                                            | 381                                               | 4144                                  | 12352                                    | 0.364292871    | 9.90E-05              | 0.001736138         |
| GO:0008272 sulfate transport                                            | 4                                              | 561                                               | 5                                     | 16491                                    | 3.1577056      | 0.000131312           | 0.002169503         |
| GO:0015116 sulfate transmembrane transporter activity                   | 4                                              | 561                                               | 5                                     | 16491                                    | 3.1577056      | 0.000131312           | 0.002169503         |

| GO Annotation term                                                                               | # down-regulated proteins with annotation term | # down-regulated proteins without annotation term | # other proteins with annotation term | # other proteins without annotation term | log odds ratio | p-value (uncorrected) | p-value (corrected) |
|--------------------------------------------------------------------------------------------------|------------------------------------------------|---------------------------------------------------|---------------------------------------|------------------------------------------|----------------|-----------------------|---------------------|
| GO:1901682 sulfur compound transmembrane transporter activity                                    | 4                                              | 561                                               | 5                                     | 16491                                    | 3.1577056      | 0.000131312           | 0.002169503         |
| GO:0072348 sulfur compound transport                                                             | 4                                              | 561                                               | 5                                     | 16491                                    | 3.1577056      | 0.000131312           | 0.002169503         |
| GO:1901575 organic substance catabolic process                                                   | 14                                             | 551                                               | 119                                   | 16377                                    | 1.251832218    | 0.000133422           | 0.002172868         |
| GO:0044711 single-organism biosynthetic process                                                  | 16                                             | 549                                               | 151                                   | 16345                                    | 1.148887763    | 0.000139337           | 0.00223724          |
| GO:0016310 phosphorylation                                                                       | 21                                             | 544                                               | 237                                   | 16259                                    | 0.97391493     | 0.000144568           | 0.002288993         |
| GO:0016746 transferase activity, transferring acyl groups                                        | 10                                             | 555                                               | 65                                    | 16431                                    | 1.516154783    | 0.000175242           | 0.002736658         |
| GO:0016301 kinase activity                                                                       | 23                                             | 542                                               | 276                                   | 16220                                    | 0.913827676    | 0.000203846           | 0.003140338         |
| GO:0006468 protein phosphorylation                                                               | 20                                             | 545                                               | 227                                   | 16269                                    | 0.967013197    | 0.000221418           | 0.003365553         |
| GO:0019538 protein metabolic process                                                             | 49                                             | 516                                               | 810                                   | 15686                                    | 0.609203159    | 0.000254472           | 0.003812012         |
| GO:0006820 anion transport                                                                       | 7                                              | 558                                               | 32                                    | 16464                                    | 1.864746742    | 0.000257478           | 0.003812012         |
| GO:0016616 oxidoreductase activity, acting on the CH-OH group of donors, NAD or NADP as acceptor | 8                                              | 557                                               | 44                                    | 16452                                    | 1.680888997    | 0.000286579           | 0.004188463         |
| GO:0016742 hydroxymethyl-, formyl- and related transferase activity                              | 3                                              | 562                                               | 2                                     | 16494                                    | 3.784715216    | 0.000343704           | 0.00495978          |
| GO:0008236 serine-type peptidase activity                                                        | 11                                             | 554                                               | 88                                    | 16408                                    | 1.308918071    | 0.000430493           | 0.006058792         |
| GO:0017171 serine hydrolase activity                                                             | 11                                             | 554                                               | 88                                    | 16408                                    | 1.308918071    | 0.000430493           | 0.006058792         |
| GO:0044283 small molecule biosynthetic process                                                   | 6                                              | 559                                               | 25                                    | 16471                                    | 1.956090709    | 0.000466556           | 0.006486269         |
| GO:0004672 protein kinase activity                                                               | 20                                             | 545                                               | 233                                   | 16263                                    | 0.940555893    | 0.000490512           | 0.006737146         |
| GO:0046872 metal ion binding                                                                     | 53                                             | 512                                               | 935                                   | 15561                                    | 0.543943822    | 0.000635131           | 0.008518229         |
| GO:0050661 NADP binding                                                                          | 3                                              | 562                                               | 3                                     | 16493                                    | 3.379189478    | 0.000670478           | 0.008785578         |
| GO:0005319 lipid transporter activity                                                            | 4                                              | 561                                               | 9                                     | 16487                                    | 2.569676349    | 0.000670277           | 0.008785578         |
| GO:0046914 transition metal ion binding                                                          | 36                                             | 529                                               | 576                                   | 15920                                    | 0.631754305    | 0.000788515           | 0.01021485          |
| GO:0005576 extracellular region                                                                  | 9                                              | 556                                               | 67                                    | 16429                                    | 1.378567009    | 0.000888917           | 0.011386127         |
| GO:0008509 anion transmembrane transporter activity                                              | 6                                              | 559                                               | 29                                    | 16467                                    | 1.807427823    | 0.000919415           | 0.01151795          |
| GO:1901607 alpha-amino acid biosynthetic process                                                 | 4                                              | 561                                               | 10                                    | 16486                                    | 2.464255177    | 0.000913942           | 0.01151795          |

| GO Annotation term                                                                                      | # down-regulated proteins with annotation term | # down-regulated proteins without annotation term | # other proteins with annotation term | # other proteins without annotation term | log odds ratio | p-value (uncorrected) | p-value (corrected) |
|---------------------------------------------------------------------------------------------------------|------------------------------------------------|---------------------------------------------------|---------------------------------------|------------------------------------------|----------------|-----------------------|---------------------|
| GO:0016772 transferase activity, transferring phosphorus-containing groups                              | 30                                             | 535                                               | 450                                   | 16046                                    | 0.692897928    | 0.001011475           | 0.01253349          |
| GO:0016798 hydrolase activity, acting on glycosyl bonds                                                 | 8                                              | 557                                               | 55                                    | 16441                                    | 1.457076611    | 0.001072976           | 0.013152608         |
| GO:0006796 phosphate-containing compound metabolic process                                              | 27                                             | 538                                               | 390                                   | 16106                                    | 0.728778719    | 0.001168704           | 0.014173645         |
| GO:0006793 phosphorus metabolic process                                                                 | 27                                             | 538                                               | 392                                   | 16104                                    | 0.723539433    | 0.001200915           | 0.01441098          |
| GO:0006575 cellular modified amino acid metabolic process                                               | 4                                              | 561                                               | 11                                    | 16485                                    | 2.368884338    | 0.001213856           | 0.014414545         |
| GO:0030170 pyridoxal phosphate binding                                                                  | 6                                              | 559                                               | 31                                    | 16465                                    | 1.740614986    | 0.001245165           | 0.0146339           |
| GO:0005575 cellular_component                                                                           | 100                                            | 465                                               | 2126                                  | 14370                                    | 0.374033201    | 0.001443121           | 0.01678733          |
| GO:0015103 inorganic anion transmembrane transporter activity                                           | 4                                              | 561                                               | 12                                    | 16484                                    | 2.281812298    | 0.001576411           | 0.018037545         |
| GO:0006807 nitrogen compound metabolic process                                                          | 41                                             | 524                                               | 707                                   | 15789                                    | 0.558118491    | 0.001582241           | 0.018037545         |
| GO:0046394 carboxylic acid biosynthetic process                                                         | 5                                              | 560                                               | 22                                    | 16474                                    | 1.899997335    | 0.00172567            | 0.019286905         |
| GO:0016053 organic acid biosynthetic process                                                            | 5                                              | 560                                               | 22                                    | 16474                                    | 1.899997335    | 0.00172567            | 0.019286905         |
| GO:0044248 cellular catabolic process                                                                   | 10                                             | 555                                               | 90                                    | 16406                                    | 1.189209709    | 0.00175263            | 0.019398044         |
| GO:0016701 oxidoreductase activity, acting on single donors with incorporation of molecular oxygen      | 3                                              | 562                                               | 5                                     | 16491                                    | 2.868242583    | 0.001786232           | 0.019579855         |
| GO:0003854 3-beta-hydroxy-delta5-steroid dehydrogenase activity                                         | 4                                              | 561                                               | 13                                    | 16483                                    | 2.201708924    | 0.002007945           | 0.020809616         |
| GO:0033764 steroid dehydrogenase activity, acting on the CH-OH group of donors, NAD or NADP as acceptor | 4                                              | 561                                               | 13                                    | 16483                                    | 2.201708924    | 0.002007945           | 0.020809616         |
| GO:0016229 steroid dehydrogenase activity                                                               | 4                                              | 561                                               | 13                                    | 16483                                    | 2.201708924    | 0.002007945           | 0.020809616         |
| GO:0019318 hexose metabolic process                                                                     | 4                                              | 561                                               | 13                                    | 16483                                    | 2.201708924    | 0.002007945           | 0.020809616         |
| GO:0015698 inorganic anion transport                                                                    | 4                                              | 561                                               | 13                                    | 16483                                    | 2.201708924    | 0.002007945           | 0.020809616         |
| GO:0004252 serine-type endopeptidase activity                                                           | 9                                              | 556                                               | 77                                    | 16419                                    | 1.238845341    | 0.002144514           | 0.022024743         |
| GO:0016903 oxidoreductase activity, acting on the aldehyde or oxo group of donors                       | 5                                              | 560                                               | 24                                    | 16472                                    | 1.812864547    | 0.002403927           | 0.024468542         |
| GO:0006694 steroid biosynthetic process                                                                 | 4                                              | 561                                               | 14                                    | 16482                                    | 2.127540281    | 0.002514704           | 0.02514704          |
| GO:0005996 monosaccharide metabolic process                                                             | 4                                              | 561                                               | 14                                    | 16482                                    | 2.127540281    | 0.002514704           | 0.02514704          |

| GO Annotation term                                                                                         | # down-regulated proteins with annotation term | # down-regulated proteins without annotation term | # other proteins with annotation term | # other proteins without annotation term | log odds ratio | p-value (uncorrected) | p-value (corrected) |
|------------------------------------------------------------------------------------------------------------|------------------------------------------------|---------------------------------------------------|---------------------------------------|------------------------------------------|----------------|-----------------------|---------------------|
| GO:0008652 cellular amino acid biosynthetic process                                                        | 4                                              | 561                                               | 15                                    | 16481                                    | 2.058486736    | 0.003102797           | 0.030493008         |
| GO:0008202 steroid metabolic process                                                                       | 4                                              | 561                                               | 15                                    | 16481                                    | 2.058486736    | 0.003102797           | 0.030493008         |
| GO:0004553 hydrolase activity, hydrolyzing O-glycosyl compounds                                            | 7                                              | 558                                               | 52                                    | 16444                                    | 1.378023416    | 0.003231489           | 0.031486306         |
| GO:0016853 isomerase activity                                                                              | 6                                              | 559                                               | 39                                    | 16457                                    | 1.510554548    | 0.003490194           | 0.033156846         |
| GO:0005509 calcium ion binding                                                                             | 11                                             | 554                                               | 117                                   | 16379                                    | 1.022311957    | 0.003526464           | 0.03322454          |
| GO:0009064 glutamine family amino acid metabolic process                                                   | 3                                              | 562                                               | 7                                     | 16489                                    | 2.531649061    | 0.003642507           | 0.033759818         |
| GO:0006006 glucose metabolic process                                                                       | 3                                              | 562                                               | 7                                     | 16489                                    | 2.531649061    | 0.003642507           | 0.033759818         |
| GO:0009058 biosynthetic process                                                                            | 30                                             | 535                                               | 491                                   | 16005                                    | 0.603142959    | 0.003793597           | 0.034597603         |
| GO:0080019 fatty-acyl-CoA reductase (alcohol-forming) activity                                             | 4                                              | 561                                               | 16                                    | 16480                                    | 1.993887537    | 0.003778169           | 0.034597603         |
| GO:0016747 transferase activity, transferring acyl groups other than amino-acyl groups                     | 6                                              | 559                                               | 40                                    | 16456                                    | 1.485175973    | 0.003903686           | 0.035319061         |
| GO:0044267 cellular protein metabolic process                                                              | 30                                             | 535                                               | 495                                   | 16001                                    | 0.594779371    | 0.003963554           | 0.035578363         |
| GO:0016620 oxidoreductase activity, acting on the aldehyde or oxo group of donors, NAD or NADP as acceptor | 4                                              | 561                                               | 18                                    | 16478                                    | 1.875983135    | 0.005413517           | 0.0467531           |

| PFAM Annotation term                                           | # down-regulated proteins with annotation term | # down-regulated proteins without annotation term | # other proteins with annotation term | # other proteins without annotation term | log odds ratio | p-value (uncorrected) | p-value (corrected) |
|----------------------------------------------------------------|------------------------------------------------|---------------------------------------------------|---------------------------------------|------------------------------------------|----------------|-----------------------|---------------------|
| PF00067.17 Cytochrome P450                                     | 22                                             | 543                                               | 110                                   | 16386                                    | 1.797635358    | 3.85E-10              | 2.90E-07            |
| PF00650.15 CRAL/TRIO domain                                    | 10                                             | 555                                               | 15                                    | 16481                                    | 2.985530259    | 3.06E-09              | 1.15E-06            |
| PF00441.19 Acyl-CoA dehydrogenase, C-terminal domain           | 6                                              | 559                                               | 3                                     | 16493                                    | 4.077689035    | 9.91E-08              | 2.49E-05            |
| PF02770.14 Acyl-CoA dehydrogenase, middle domain               | 6                                              | 559                                               | 4                                     | 16492                                    | 3.789946329    | 2.41E-07              | 3.63E-05            |
| PF08028.6 Acyl-CoA dehydrogenase, C-terminal domain            | 5                                              | 560                                               | 1                                     | 16495                                    | 4.992313712    | 2.28E-07              | 3.63E-05            |
| PF07859.8 alpha/beta hydrolase fold                            | 9                                              | 556                                               | 22                                    | 16474                                    | 2.494952489    | 4.72E-07              | 4.65E-05            |
| PF07690.11 Major Facilitator Superfamily                       | 17                                             | 548                                               | 104                                   | 16392                                    | 1.587095848    | 4.94E-07              | 4.65E-05            |
| PF02958.15 Ecdysteroid kinase                                  | 8                                              | 557                                               | 15                                    | 16481                                    | 2.758789582    | 4.35E-07              | 4.65E-05            |
| PF08659.5 KR domain                                            | 12                                             | 553                                               | 50                                    | 16446                                    | 1.965363208    | 7.38E-07              | 6.17E-05            |
| PF00106.20 short chain dehydrogenase                           | 13                                             | 552                                               | 63                                    | 16433                                    | 1.815313372    | 1.13E-06              | 8.53E-05            |
| PF00083.19 Sugar (and other) transporter                       | 13                                             | 552                                               | 66                                    | 16430                                    | 1.76861078     | 1.79E-06              | 0.000122302         |
| PF02771.11 Acyl-CoA dehydrogenase, N-terminal domain           | 5                                              | 560                                               | 3                                     | 16493                                    | 3.893580167    | 2.02E-06              | 0.000126605         |
| PF01370.16 NAD dependent epimerase/dehydratase family          | 9                                              | 556                                               | 29                                    | 16467                                    | 2.21827411     | 3.10E-06              | 0.00017983          |
| PF00378.15 Enoyl-CoA hydratase/isomerase family                | 5                                              | 560                                               | 5                                     | 16491                                    | 3.382633273    | 8.59E-06              | 0.000462047         |
| PF13561.1 Enoyl-(Acyl carrier protein) reductase               | 9                                              | 556                                               | 35                                    | 16461                                    | 2.029857447    | 1.13E-05              | 0.000515536         |
| PF07914.6 Protein of unknown function (DUF1679)                | 6                                              | 559                                               | 11                                    | 16485                                    | 2.777920879    | 1.16E-05              | 0.000515536         |
| PF00128.19 Alpha amylase, catalytic domain                     | 6                                              | 559                                               | 11                                    | 16485                                    | 2.777920879    | 1.16E-05              | 0.000515536         |
| PF03765.10 CRAL/TRIO, N-terminal domain                        | 4                                              | 561                                               | 2                                     | 16494                                    | 4.074178232    | 1.69E-05              | 0.000708228         |
| PF02719.10 Polysaccharide biosynthesis protein                 | 5                                              | 560                                               | 9                                     | 16487                                    | 2.794604022    | 6.11E-05              | 0.002422004         |
| PF01347.17 Lipoprotein amino terminal region                   | 4                                              | 561                                               | 4                                     | 16492                                    | 3.380909788    | 7.49E-05              | 0.002742374         |
| PF00501.23 AMP-binding enzyme                                  | 6                                              | 559                                               | 17                                    | 16479                                    | 2.342238774    | 8.01E-05              | 0.002742374         |
| PF00732.14 GMC oxidoreductase                                  | 6                                              | 559                                               | 17                                    | 16479                                    | 2.342238774    | 8.01E-05              | 0.002742374         |
| PF13792.1 Sulfate transporter N-terminal domain with GLY motif | 4                                              | 561                                               | 5                                     | 16491                                    | 3.1577056      | 0.000131312           | 0.003409584         |

| PFAM Annotation term                                              | # down-regulated proteins with annotation term | # down-regulated proteins without annotation term | # other proteins with annotation term | # other proteins without annotation term | log odds ratio | p-value (uncorrected) | p-value (corrected) |
|-------------------------------------------------------------------|------------------------------------------------|---------------------------------------------------|---------------------------------------|------------------------------------------|----------------|-----------------------|---------------------|
| PF13716.1 Divergent CRAL/TRIO domain                              | 5                                              | 560                                               | 11                                    | 16485                                    | 2.593812011    | 0.000126193           | 0.003409584         |
| PF00171.17 Aldehyde dehydrogenase family                          | 4                                              | 561                                               | 5                                     | 16491                                    | 3.1577056      | 0.000131312           | 0.003409584         |
| PF01740.16 STAS domain                                            | 4                                              | 561                                               | 5                                     | 16491                                    | 3.1577056      | 0.000131312           | 0.003409584         |
| PF00069.20 Protein kinase domain                                  | 20                                             | 545                                               | 217                                   | 16279                                    | 1.012680338    | 0.000127143           | 0.003409584         |
| PF00916.15 Sulfate transporter family                             | 4                                              | 561                                               | 5                                     | 16491                                    | 3.1577056      | 0.000131312           | 0.003409584         |
| PF07714.12 Protein tyrosine kinase                                | 20                                             | 545                                               | 214                                   | 16282                                    | 1.026785946    | 0.000106862           | 0.003409584         |
| PF05199.8 GMC oxidoreductase                                      | 5                                              | 560                                               | 14                                    | 16482                                    | 2.352467954    | 0.000309354           | 0.007764787         |
| PF01130.16 CD36 family                                            | 4                                              | 561                                               | 8                                     | 16488                                    | 2.687520036    | 0.000476464           | 0.011321638         |
| PF00135.23 Carboxylesterase family                                | 7                                              | 558                                               | 36                                    | 16460                                    | 1.746720722    | 0.000481132           | 0.011321638         |
| PF00370.16 FGGY family of carbohydrate kinases, N-terminal domain | 3                                              | 562                                               | 3                                     | 16493                                    | 3.379189478    | 0.000670478           | 0.014424863         |
| PF00294.19 pfkB family carbohydrate kinase                        | 3                                              | 562                                               | 3                                     | 16493                                    | 3.379189478    | 0.000670478           | 0.014424863         |
| PF00089.21 Trypsin                                                | 9                                              | 556                                               | 64                                    | 16432                                    | 1.424559132    | 0.000661171           | 0.014424863         |
| PF13193.1 AMP-binding enzyme C-terminal domain                    | 4                                              | 561                                               | 10                                    | 16486                                    | 2.464255177    | 0.000913942           | 0.019116628         |
| PF00248.16 Aldo/keto reductase family                             | 3                                              | 562                                               | 4                                     | 16492                                    | 3.091446771    | 0.001144488           | 0.023291875         |
| PF00155.16 Aminotransferase class I and II                        | 4                                              | 561                                               | 12                                    | 16484                                    | 2.281812298    | 0.001576411           | 0.031237826         |
| PF02782.11 FGGY family of carbohydrate kinases, C-terminal domain | 3                                              | 562                                               | 5                                     | 16491                                    | 2.868242583    | 0.001786232           | 0.033625825         |
| PF01633.15 Choline/ethanolamine kinase                            | 3                                              | 562                                               | 5                                     | 16491                                    | 2.868242583    | 0.001786232           | 0.033625825         |
| PF06585.6 Haemolymph juvenile hormone binding protein (JHBP)      | 4                                              | 561                                               | 13                                    | 16483                                    | 2.201708924    | 0.002007945           | 0.035999592         |
| PF01073.14 3-beta hydroxysteroid dehydrogenase/isomerase family   | 4                                              | 561                                               | 13                                    | 16483                                    | 2.201708924    | 0.002007945           | 0.035999592         |
| PF00005.22 ABC transporter                                        | 6                                              | 559                                               | 36                                    | 16460                                    | 1.590779532    | 0.002443631           | 0.04279195          |
| PF01061.19 ABC-2 type transporter                                 | 4                                              | 561                                               | 14                                    | 16482                                    | 2.127540281    | 0.002514704           | 0.043035729         |

| <b>SSP Annotation term</b>    | <b># down-regulated proteins with annotation term</b> | <b># down-regulated proteins without annotation term</b> | <b># other proteins with annotation term</b> | <b># other proteins without annotation term</b> | <b>log odds ratio</b> | <b>p-value (uncorrected)</b> | <b>p-value (corrected)</b> |
|-------------------------------|-------------------------------------------------------|----------------------------------------------------------|----------------------------------------------|-------------------------------------------------|-----------------------|------------------------------|----------------------------|
| SSP<br>Small Secreted Protein | 19                                                    | 546                                                      | 292                                          | 16204                                           | 0.658079605           | 0.009701656                  | 0.009701656                |

| <b>Secretome Annotation term</b>           | <b># down-regulated proteins with annotation term</b> | <b># down-regulated proteins without annotation term</b> | <b># other proteins with annotation term</b> | <b># other proteins without annotation term</b> | <b>log odds ratio</b> | <b>p-value (uncorrected)</b> | <b>p-value (corrected)</b> |
|--------------------------------------------|-------------------------------------------------------|----------------------------------------------------------|----------------------------------------------|-------------------------------------------------|-----------------------|------------------------------|----------------------------|
| secretome<br>Has a SignalP signal sequence | 83                                                    | 482                                                      | 860                                          | 15636                                           | 1.141295331           | 1.95E-16                     | 1.95E-16                   |



## Healthy Ants at 10AM vs Manipulated Biting Behavior

**Table 5:** Overrepresentation of annotation terms within the total of 377 up-regulated *Camponotus floridanus* homologs (2-fold and significant  $Q < 0.05$ , minimum expression of 4) in live manipulated *Camponotus castaneus* ant heads (Manipulated Biting Behavior samples) compared to gene expression in healthy *Camponotus castaneus* ant heads at the same time of day; 10 AM (Ant Controls at 10AM samples)

| GO Annotation term                                                        | # up-regulated proteins with annotation term | # up-regulated proteins without annotation term | # other proteins with annotation term | # other proteins without annotation term | log odds ratio | p-value (uncorrected) | p-value (corrected) |
|---------------------------------------------------------------------------|----------------------------------------------|-------------------------------------------------|---------------------------------------|------------------------------------------|----------------|-----------------------|---------------------|
| GO:0003674 molecular_function                                             | 202                                          | 175                                             | 6100                                  | 10584                                    | 0.694536379    | 3.17E-11              | 3.62E-08            |
| GO:0065007 biological regulation                                          | 49                                           | 328                                             | 821                                   | 15863                                    | 1.060028213    | 1.59E-09              | 9.05E-07            |
| GO:0050794 regulation of cellular process                                 | 47                                           | 330                                             | 787                                   | 15897                                    | 1.05671239     | 3.49E-09              | 1.32E-06            |
| GO:0050789 regulation of biological process                               | 47                                           | 330                                             | 795                                   | 15889                                    | 1.046095157    | 4.72E-09              | 1.34E-06            |
| GO:0019222 regulation of metabolic process                                | 26                                           | 351                                             | 335                                   | 16349                                    | 1.285101795    | 1.38E-07              | 1.15E-05            |
| GO:2001141 regulation of RNA biosynthetic process                         | 24                                           | 353                                             | 283                                   | 16401                                    | 1.371236463    | 9.30E-08              | 1.15E-05            |
| GO:0051252 regulation of RNA metabolic process                            | 24                                           | 353                                             | 283                                   | 16401                                    | 1.371236463    | 9.30E-08              | 1.15E-05            |
| GO:0010556 regulation of macromolecule biosynthetic process               | 24                                           | 353                                             | 290                                   | 16394                                    | 1.346375544    | 1.42E-07              | 1.15E-05            |
| GO:0006355 regulation of transcription, DNA-templated                     | 24                                           | 353                                             | 283                                   | 16401                                    | 1.371236463    | 9.30E-08              | 1.15E-05            |
| GO:0031323 regulation of cellular metabolic process                       | 26                                           | 351                                             | 329                                   | 16355                                    | 1.303541504    | 9.91E-08              | 1.15E-05            |
| GO:2000112 regulation of cellular macromolecule biosynthetic process      | 24                                           | 353                                             | 290                                   | 16394                                    | 1.346375544    | 1.42E-07              | 1.15E-05            |
| GO:0010468 regulation of gene expression                                  | 24                                           | 353                                             | 290                                   | 16394                                    | 1.346375544    | 1.42E-07              | 1.15E-05            |
| GO:0009889 regulation of biosynthetic process                             | 24                                           | 353                                             | 290                                   | 16394                                    | 1.346375544    | 1.42E-07              | 1.15E-05            |
| GO:0031326 regulation of cellular biosynthetic process                    | 24                                           | 353                                             | 290                                   | 16394                                    | 1.346375544    | 1.42E-07              | 1.15E-05            |
| GO:0051171 regulation of nitrogen compound metabolic process              | 25                                           | 352                                             | 319                                   | 16365                                    | 1.292953733    | 2.04E-07              | 1.45E-05            |
| GO:0019219 regulation of nucleobase-containing compound metabolic process | 25                                           | 352                                             | 319                                   | 16365                                    | 1.292953733    | 2.04E-07              | 1.45E-05            |
| GO:0060255 regulation of macromolecule metabolic process                  | 24                                           | 353                                             | 300                                   | 16384                                    | 1.311863827    | 2.53E-07              | 1.56E-05            |
| GO:0036211 protein modification process                                   | 26                                           | 351                                             | 348                                   | 16336                                    | 1.246234375    | 2.75E-07              | 1.56E-05            |

| GO Annotation term                                                     | # up-regulated proteins with annotation term | # up-regulated proteins without annotation term | # other proteins with annotation term | # other proteins without annotation term | log odds ratio | p-value (uncorrected) | p-value (corrected) |
|------------------------------------------------------------------------|----------------------------------------------|-------------------------------------------------|---------------------------------------|------------------------------------------|----------------|-----------------------|---------------------|
| GO:0005488 binding                                                     | 140                                          | 237                                             | 4188                                  | 12496                                    | 0.566767582    | 3.15E-07              | 1.56E-05            |
| GO:0043412 macromolecule modification                                  | 27                                           | 350                                             | 373                                   | 16311                                    | 1.215920298    | 2.91E-07              | 1.56E-05            |
| GO:0016310 phosphorylation                                             | 21                                           | 356                                             | 237                                   | 16447                                    | 1.409429934    | 3.07E-07              | 1.56E-05            |
| GO:0006464 cellular protein modification process                       | 26                                           | 351                                             | 348                                   | 16336                                    | 1.246234375    | 2.75E-07              | 1.56E-05            |
| GO:0080090 regulation of primary metabolic process                     | 25                                           | 352                                             | 327                                   | 16357                                    | 1.267695698    | 3.14E-07              | 1.56E-05            |
| GO:0003700 sequence-specific DNA binding transcription factor activity | 18                                           | 359                                             | 186                                   | 16498                                    | 1.492297136    | 6.72E-07              | 2.84E-05            |
| GO:0001071 nucleic acid binding transcription factor activity          | 18                                           | 359                                             | 186                                   | 16498                                    | 1.492297136    | 6.72E-07              | 2.84E-05            |
| GO:0006796 phosphate-containing compound metabolic process             | 27                                           | 350                                             | 390                                   | 16294                                    | 1.170309193    | 6.59E-07              | 2.84E-05            |
| GO:0006468 protein phosphorylation                                     | 20                                           | 357                                             | 227                                   | 16457                                    | 1.401552672    | 6.40E-07              | 2.84E-05            |
| GO:0006793 phosphorus metabolic process                                | 27                                           | 350                                             | 392                                   | 16292                                    | 1.165071341    | 7.23E-07              | 2.94E-05            |
| GO:0004672 protein kinase activity                                     | 20                                           | 357                                             | 233                                   | 16451                                    | 1.375099583    | 9.34E-07              | 3.67E-05            |
| GO:0016301 kinase activity                                             | 21                                           | 356                                             | 278                                   | 16406                                    | 1.247372994    | 3.35E-06              | 0.000127159         |
| GO:0043565 sequence-specific DNA binding                               | 15                                           | 362                                             | 172                                   | 16512                                    | 1.380754181    | 1.81E-05              | 0.000627713         |
| GO:0005515 protein binding                                             | 60                                           | 317                                             | 1496                                  | 15188                                    | 0.653153551    | 1.80E-05              | 0.000627713         |
| GO:0016773 phosphotransferase activity, alcohol group as acceptor      | 20                                           | 357                                             | 288                                   | 16396                                    | 1.159828693    | 1.82E-05              | 0.000627713         |
| GO:0008150 biological_process                                          | 129                                          | 248                                             | 4115                                  | 12569                                    | 0.462978289    | 3.95E-05              | 0.001325418         |
| GO:0019538 protein metabolic process                                   | 37                                           | 340                                             | 822                                   | 15862                                    | 0.741913491    | 0.000107687           | 0.003494178         |
| GO:0008610 lipid biosynthetic process                                  | 8                                            | 369                                             | 59                                    | 16625                                    | 1.809770319    | 0.000110342           | 0.003494178         |
| GO:0044267 cellular protein metabolic process                          | 26                                           | 351                                             | 499                                   | 16185                                    | 0.876544385    | 0.000121136           | 0.003732313         |
| GO:0004725 protein tyrosine phosphatase activity                       | 5                                            | 372                                             | 20                                    | 16664                                    | 2.415817768    | 0.000189296           | 0.005678882         |
| GO:0044255 cellular lipid metabolic process                            | 8                                            | 369                                             | 66                                    | 16618                                    | 1.69723188     | 0.000222979           | 0.006517833         |

| <b>GO Annotation term</b>                                 | <b># up-regulated proteins with annotation term</b> | <b># up-regulated proteins without annotation term</b> | <b># other proteins with annotation term</b> | <b># other proteins without annotation term</b> | <b>log odds ratio</b> | <b>p-value (uncorrected)</b> | <b>p-value (corrected)</b> |
|-----------------------------------------------------------|-----------------------------------------------------|--------------------------------------------------------|----------------------------------------------|-------------------------------------------------|-----------------------|------------------------------|----------------------------|
| GO:0043167 ion binding                                    | 64                                                  | 313                                                    | 1829                                         | 14855                                           | 0.507247032           | 0.000475476                  | 0.013551071                |
| GO:0008653 lipopolysaccharide metabolic process           | 4                                                   | 373                                                    | 14                                           | 16670                                           | 2.547024588           | 0.000561663                  | 0.015245138                |
| GO:0009103 lipopolysaccharide biosynthetic process        | 4                                                   | 373                                                    | 14                                           | 16670                                           | 2.547024588           | 0.000561663                  | 0.015245138                |
| GO:0006629 lipid metabolic process                        | 11                                                  | 366                                                    | 143                                          | 16541                                           | 1.246014735           | 0.000635726                  | 0.01647108                 |
| GO:0006470 protein dephosphorylation                      | 5                                                   | 372                                                    | 27                                           | 16657                                           | 2.11529302            | 0.000631971                  | 0.01647108                 |
| GO:0003677 DNA binding                                    | 23                                                  | 354                                                    | 464                                          | 16220                                           | 0.820313078           | 0.000746099                  | 0.018901164                |
| GO:0004721 phosphoprotein phosphatase activity            | 5                                                   | 372                                                    | 29                                           | 16655                                           | 2.043713979           | 0.000842221                  | 0.020872432                |
| GO:0046872 metal ion binding                              | 38                                                  | 339                                                    | 950                                          | 15734                                           | 0.618703323           | 0.001073346                  | 0.026034339                |
| GO:0019199 transmembrane receptor protein kinase activity | 3                                                   | 374                                                    | 7                                            | 16677                                           | 2.950232146           | 0.00114436                   | 0.027178541                |
| GO:0043169 cation binding                                 | 38                                                  | 339                                                    | 968                                          | 15716                                           | 0.598788546           | 0.001217949                  | 0.028335946                |
| GO:0016311 dephosphorylation                              | 5                                                   | 372                                                    | 33                                           | 16651                                           | 1.91426205            | 0.00141342                   | 0.031594104                |

| <b>PFAM Annotation term</b>                           | <b># up-regulated proteins with annotation term</b> | <b># up-regulated proteins without annotation term</b> | <b># other proteins with annotation term</b> | <b># other proteins without annotation term</b> | <b>log odds ratio</b> | <b>p-value (uncorrected)</b> | <b>p-value (corrected)</b> |
|-------------------------------------------------------|-----------------------------------------------------|--------------------------------------------------------|----------------------------------------------|-------------------------------------------------|-----------------------|------------------------------|----------------------------|
| PF07716.10 Basic region leucine zipper                | 7                                                   | 370                                                    | 12                                           | 16672                                           | 3.268986438           | 9.75E-08                     | 7.34E-05                   |
| PF00170.16 bZIP transcription factor                  | 6                                                   | 371                                                    | 10                                           | 16674                                           | 3.294578213           | 7.43E-07                     | 0.000267124                |
| PF00069.20 Protein kinase domain                      | 19                                                  | 358                                                    | 218                                          | 16466                                           | 1.388463858           | 1.42E-06                     | 0.000267124                |
| PF07714.12 Protein tyrosine kinase                    | 19                                                  | 358                                                    | 215                                          | 16469                                           | 1.40250307            | 1.17E-06                     | 0.000267124                |
| PF01094.23 Receptor family ligand binding region      | 5                                                   | 372                                                    | 19                                           | 16665                                           | 2.46717107            | 0.000154213                  | 0.023224514                |
| PF00102.22 Protein-tyrosine phosphatase               | 5                                                   | 372                                                    | 20                                           | 16664                                           | 2.415817768           | 0.000189296                  | 0.023756658                |
| PF06293.9 Lipopolysaccharide kinase (Kdo/WaaP) family | 4                                                   | 373                                                    | 13                                           | 16671                                           | 2.621192546           | 0.000444554                  | 0.047821334                |

**Table 6:** Overrepresentation of annotation terms within the total of 391 down-regulated *Camponotus floridanus* homologs (2-fold and significant  $Q < 0.05$ , minimum expression of 4) in live manipulated *Camponotus castaneus* ant heads (Manipulated Biting Behavior samples) compared to gene expression in healthy *Camponotus castaneus* ant heads at the same time of day; 10 AM (Ant Controls at 10AM samples)

| GO Annotation term                                   | # down-regulated proteins with annotation term | # down-regulated proteins without annotation term | # other proteins with annotation term | # other proteins without annotation term | log odds ratio | p-value (uncorrected) | p-value (corrected) |
|------------------------------------------------------|------------------------------------------------|---------------------------------------------------|---------------------------------------|------------------------------------------|----------------|-----------------------|---------------------|
| GO:0008150 biological_process                        | 226                                            | 165                                               | 4018                                  | 12652                                    | 1.461620564    | 1.46E-44              | 1.66E-41            |
| GO:0003824 catalytic activity                        | 174                                            | 217                                               | 2590                                  | 14080                                    | 1.472255421    | 1.05E-40              | 5.97E-38            |
| GO:0008152 metabolic process                         | 165                                            | 226                                               | 2349                                  | 14321                                    | 1.49314776     | 1.92E-40              | 7.31E-38            |
| GO:0003674 molecular_function                        | 261                                            | 130                                               | 6041                                  | 10629                                    | 1.26200251     | 1.82E-33              | 5.19E-31            |
| GO:0044699 single-organism process                   | 126                                            | 265                                               | 1627                                  | 15043                                    | 1.480727019    | 2.78E-33              | 6.34E-31            |
| GO:0044710 single-organism metabolic process         | 79                                             | 312                                               | 843                                   | 15827                                    | 1.558950328    | 5.74E-25              | 1.09E-22            |
| GO:0016491 oxidoreductase activity                   | 58                                             | 333                                               | 472                                   | 16198                                    | 1.787964592    | 1.57E-23              | 2.55E-21            |
| GO:0055114 oxidation-reduction process               | 48                                             | 343                                               | 380                                   | 16290                                    | 1.791606013    | 5.17E-20              | 7.37E-18            |
| GO:0044763 single-organism cellular process          | 66                                             | 325                                               | 912                                   | 15758                                    | 1.255293021    | 1.70E-15              | 2.15E-13            |
| GO:0071704 organic substance metabolic process       | 94                                             | 297                                               | 1741                                  | 14929                                    | 0.998408613    | 3.58E-14              | 3.71E-12            |
| GO:0044238 primary metabolic process                 | 91                                             | 300                                               | 1655                                  | 15015                                    | 1.012325724    | 3.55E-14              | 3.71E-12            |
| GO:0044281 small molecule metabolic process          | 27                                             | 364                                               | 191                                   | 16479                                    | 1.856251692    | 9.44E-13              | 8.97E-11            |
| GO:0044765 single-organism transport                 | 38                                             | 353                                               | 416                                   | 16254                                    | 1.436527154    | 5.44E-12              | 4.77E-10            |
| GO:0005975 carbohydrate metabolic process            | 23                                             | 368                                               | 160                                   | 16510                                    | 1.863958999    | 3.51E-11              | 2.86E-09            |
| GO:1901564 organonitrogen compound metabolic process | 27                                             | 364                                               | 238                                   | 16432                                    | 1.633398257    | 9.35E-11              | 7.11E-09            |
| GO:0006810 transport                                 | 41                                             | 350                                               | 559                                   | 16111                                    | 1.216746987    | 4.29E-10              | 2.92E-08            |
| GO:0009987 cellular process                          | 98                                             | 293                                               | 2196                                  | 14474                                    | 0.790511282    | 4.35E-10              | 2.92E-08            |
| GO:0051234 establishment of localization             | 41                                             | 350                                               | 561                                   | 16109                                    | 1.213051408    | 4.74E-10              | 3.00E-08            |
| GO:0005506 iron ion binding                          | 19                                             | 372                                               | 138                                   | 16532                                    | 1.811344615    | 3.49E-09              | 2.10E-07            |
| GO:0043167 ion binding                               | 82                                             | 309                                               | 1811                                  | 14859                                    | 0.778104534    | 1.12E-08              | 6.39E-07            |

| GO Annotation term                                                                                               | # down-regulated proteins with annotation term | # down-regulated proteins without annotation term | # other proteins with annotation term | # other proteins without annotation term | log odds ratio | p-value (uncorrected) | p-value (corrected) |
|------------------------------------------------------------------------------------------------------------------|------------------------------------------------|---------------------------------------------------|---------------------------------------|------------------------------------------|----------------|-----------------------|---------------------|
| GO:0016787 hydrolase activity                                                                                    | 56                                             | 335                                               | 1048                                  | 15622                                    | 0.91301775     | 1.77E-08              | 9.59E-07            |
| GO:0016021 integral component of membrane                                                                        | 35                                             | 356                                               | 496                                   | 16174                                    | 1.165001698    | 2.19E-08              | 1.14E-06            |
| GO:0043436 oxoacid metabolic process                                                                             | 15                                             | 376                                               | 94                                    | 16576                                    | 1.950877421    | 2.77E-08              | 1.26E-06            |
| GO:0006082 organic acid metabolic process                                                                        | 15                                             | 376                                               | 94                                    | 16576                                    | 1.950877421    | 2.77E-08              | 1.26E-06            |
| GO:0019752 carboxylic acid metabolic process                                                                     | 15                                             | 376                                               | 94                                    | 16576                                    | 1.950877421    | 2.77E-08              | 1.26E-06            |
| GO:0020037 heme binding                                                                                          | 18                                             | 373                                               | 150                                   | 16520                                    | 1.670485091    | 6.16E-08              | 2.60E-06            |
| GO:0046906 tetrapyrrole binding                                                                                  | 18                                             | 373                                               | 150                                   | 16520                                    | 1.670485091    | 6.16E-08              | 2.60E-06            |
| GO:0044425 membrane part                                                                                         | 38                                             | 353                                               | 599                                   | 16071                                    | 1.060628189    | 7.46E-08              | 3.04E-06            |
| GO:0043169 cation binding                                                                                        | 51                                             | 340                                               | 955                                   | 15715                                    | 0.903539624    | 9.11E-08              | 3.58E-06            |
| GO:0006869 lipid transport                                                                                       | 6                                              | 385                                               | 6                                     | 16664                                    | 3.767762649    | 1.15E-07              | 4.23E-06            |
| GO:0005215 transporter activity                                                                                  | 28                                             | 363                                               | 364                                   | 16306                                    | 1.239936226    | 1.15E-07              | 4.23E-06            |
| GO:0006520 cellular amino acid metabolic process                                                                 | 13                                             | 378                                               | 77                                    | 16593                                    | 2.002985939    | 1.31E-07              | 4.68E-06            |
| GO:0044712 single-organism catabolic process                                                                     | 11                                             | 380                                               | 51                                    | 16619                                    | 2.244200285    | 1.42E-07              | 4.90E-06            |
| GO:0055085 transmembrane transport                                                                               | 23                                             | 368                                               | 271                                   | 16399                                    | 1.330268093    | 3.26E-07              | 1.09E-05            |
| GO:1901605 alpha-amino acid metabolic process                                                                    | 8                                              | 383                                               | 24                                    | 16646                                    | 2.673277948    | 4.60E-07              | 1.50E-05            |
| GO:0016705 oxidoreductase activity, acting on paired donors, with incorporation or reduction of molecular oxygen | 16                                             | 375                                               | 144                                   | 16526                                    | 1.588539574    | 8.58E-07              | 2.72E-05            |
| GO:0004576 oligosaccharyl transferase activity                                                                   | 4                                              | 387                                               | 1                                     | 16669                                    | 5.149175654    | 1.33E-06              | 4.11E-05            |
| GO:0044282 small molecule catabolic process                                                                      | 6                                              | 385                                               | 11                                    | 16659                                    | 3.161326752    | 1.39E-06              | 4.18E-05            |
| GO:0009069 serine family amino acid metabolic process                                                            | 5                                              | 386                                               | 6                                     | 16664                                    | 3.582847057    | 2.54E-06              | 7.43E-05            |
| GO:0046872 metal ion binding                                                                                     | 47                                             | 344                                               | 941                                   | 15729                                    | 0.825824226    | 2.62E-06              | 7.47E-05            |
| GO:0044237 cellular metabolic process                                                                            | 60                                             | 331                                               | 1364                                  | 15306                                    | 0.710049536    | 4.32E-06              | 0.000119991         |
| GO:0005575 cellular_component                                                                                    | 83                                             | 308                                               | 2143                                  | 14527                                    | 0.602543095    | 6.16E-06              | 0.000167218         |
| GO:0005319 lipid transporter activity                                                                            | 5                                              | 386                                               | 8                                     | 16662                                    | 3.295044958    | 6.82E-06              | 0.000180696         |

| GO Annotation term                                                  | # down-regulated proteins with annotation term | # down-regulated proteins without annotation term | # other proteins with annotation term | # other proteins without annotation term | log odds ratio | p-value (uncorrected) | p-value (corrected) |
|---------------------------------------------------------------------|------------------------------------------------|---------------------------------------------------|---------------------------------------|------------------------------------------|----------------|-----------------------|---------------------|
| GO:0009056 catabolic process                                        | 13                                             | 378                                               | 124                                   | 16546                                    | 1.523673256    | 1.62E-05              | 0.000419096         |
| GO:0016740 transferase activity                                     | 37                                             | 354                                               | 734                                   | 15936                                    | 0.819447951    | 2.08E-05              | 0.000527463         |
| GO:0016054 organic acid catabolic process                           | 5                                              | 386                                               | 11                                    | 16659                                    | 2.97641116     | 2.19E-05              | 0.000530068         |
| GO:0046395 carboxylic acid catabolic process                        | 5                                              | 386                                               | 11                                    | 16659                                    | 2.97641116     | 2.19E-05              | 0.000530068         |
| GO:0048037 cofactor binding                                         | 14                                             | 377                                               | 153                                   | 16517                                    | 1.388519653    | 3.14E-05              | 0.000745073         |
| GO:0005509 calcium ion binding                                      | 12                                             | 379                                               | 116                                   | 16554                                    | 1.508163297    | 3.85E-05              | 0.000895968         |
| GO:0003995 acyl-CoA dehydrogenase activity                          | 4                                              | 387                                               | 6                                     | 16664                                    | 3.357116182    | 5.11E-05              | 0.001143056         |
| GO:0006544 glycine metabolic process                                | 4                                              | 387                                               | 6                                     | 16664                                    | 3.357116182    | 5.11E-05              | 0.001143056         |
| GO:1901575 organic substance catabolic process                      | 12                                             | 379                                               | 121                                   | 16549                                    | 1.465660855    | 5.62E-05              | 0.00121639          |
| GO:0004553 hydrolase activity, hydrolyzing O-glycosyl compounds     | 8                                              | 383                                               | 51                                    | 16619                                    | 1.917882818    | 5.66E-05              | 0.00121639          |
| GO:0071702 organic substance transport                              | 12                                             | 379                                               | 125                                   | 16545                                    | 1.432895928    | 7.50E-05              | 0.001583916         |
| GO:0046914 transition metal ion binding                             | 30                                             | 361                                               | 582                                   | 16088                                    | 0.831677907    | 8.88E-05              | 0.001839779         |
| GO:0016798 hydrolase activity, acting on glycosyl bonds             | 8                                              | 383                                               | 55                                    | 16615                                    | 1.842134548    | 9.12E-05              | 0.001856638         |
| GO:0019538 protein metabolic process                                | 38                                             | 353                                               | 821                                   | 15849                                    | 0.731456679    | 9.59E-05              | 0.001918921         |
| GO:0055086 nucleobase-containing small molecule metabolic process   | 10                                             | 381                                               | 90                                    | 16580                                    | 1.575928476    | 9.85E-05              | 0.001936513         |
| GO:0016742 hydroxymethyl-, formyl- and related transferase activity | 3                                              | 388                                               | 2                                     | 16668                                    | 4.165705761    | 0.000115429           | 0.002230332         |
| GO:0070085 glycosylation                                            | 5                                              | 386                                               | 18                                    | 16652                                    | 2.483514393    | 0.000147487           | 0.002802248         |
| GO:1901565 organonitrogen compound catabolic process                | 6                                              | 385                                               | 30                                    | 16640                                    | 2.156883468    | 0.000151722           | 0.002835465         |
| GO:0005783 endoplasmic reticulum                                    | 4                                              | 387                                               | 9                                     | 16661                                    | 2.951471029    | 0.000164845           | 0.002982918         |
| GO:0009063 cellular amino acid catabolic process                    | 4                                              | 387                                               | 9                                     | 16661                                    | 2.951471029    | 0.000164845           | 0.002982918         |
| GO:0006820 anion transport                                          | 6                                              | 385                                               | 33                                    | 16637                                    | 2.061392983    | 0.000239841           | 0.004272169         |
| GO:0022857 transmembrane transporter activity                       | 19                                             | 372                                               | 326                                   | 16344                                    | 0.94026388     | 0.000405491           | 0.007111682         |
| GO:0008236 serine-type peptidase activity                           | 9                                              | 382                                               | 90                                    | 16580                                    | 1.467946727    | 0.000447407           | 0.007612595         |
| GO:0017171 serine hydrolase activity                                | 9                                              | 382                                               | 90                                    | 16580                                    | 1.467946727    | 0.000447407           | 0.007612595         |

| GO Annotation term                                                      | # down-regulated proteins with annotation term | # down-regulated proteins without annotation term | # other proteins with annotation term | # other proteins without annotation term | log odds ratio | p-value (uncorrected) | p-value (corrected) |
|-------------------------------------------------------------------------|------------------------------------------------|---------------------------------------------------|---------------------------------------|------------------------------------------|----------------|-----------------------|---------------------|
| GO:0050662 coenzyme binding                                             | 10                                             | 381                                               | 115                                   | 16555                                    | 1.329297039    | 0.000609175           | 0.009999287         |
| GO:0009071 serine family amino acid catabolic process                   | 3                                              | 388                                               | 5                                     | 16665                                    | 3.249235027    | 0.000613991           | 0.009999287         |
| GO:0006546 glycine catabolic process                                    | 3                                              | 388                                               | 5                                     | 16665                                    | 3.249235027    | 0.000613991           | 0.009999287         |
| GO:0005488 binding                                                      | 129                                            | 262                                               | 4199                                  | 12471                                    | 0.380027448    | 0.000633388           | 0.010169897         |
| GO:0006807 nitrogen compound metabolic process                          | 32                                             | 359                                               | 716                                   | 15954                                    | 0.686198208    | 0.000657242           | 0.010406333         |
| GO:0016758 transferase activity, transferring hexosyl groups            | 7                                              | 384                                               | 58                                    | 16612                                    | 1.652705191    | 0.000698182           | 0.01090311          |
| GO:0006811 ion transport                                                | 13                                             | 378                                               | 188                                   | 16482                                    | 1.103637354    | 0.000767556           | 0.011824511         |
| GO:0006486 protein glycosylation                                        | 4                                              | 387                                               | 15                                    | 16655                                    | 2.440285218    | 0.000801369           | 0.012020536         |
| GO:0043413 macromolecule glycosylation                                  | 4                                              | 387                                               | 15                                    | 16655                                    | 2.440285218    | 0.000801369           | 0.012020536         |
| GO:0008272 sulfate transport                                            | 3                                              | 388                                               | 6                                     | 16664                                    | 3.066853463    | 0.000905363           | 0.012901429         |
| GO:0015116 sulfate transmembrane transporter activity                   | 3                                              | 388                                               | 6                                     | 16664                                    | 3.066853463    | 0.000905363           | 0.012901429         |
| GO:1901682 sulfur compound transmembrane transporter activity           | 3                                              | 388                                               | 6                                     | 16664                                    | 3.066853463    | 0.000905363           | 0.012901429         |
| GO:0072348 sulfur compound transport                                    | 3                                              | 388                                               | 6                                     | 16664                                    | 3.066853463    | 0.000905363           | 0.012901429         |
| GO:0044723 single-organism carbohydrate metabolic process               | 8                                              | 383                                               | 81                                    | 16589                                    | 1.453452502    | 0.000992824           | 0.013973075         |
| GO:0022892 substrate-specific transporter activity                      | 15                                             | 376                                               | 246                                   | 16424                                    | 0.97962848     | 0.001054266           | 0.014656863         |
| GO:0008509 anion transmembrane transporter activity                     | 5                                              | 386                                               | 30                                    | 16640                                    | 1.971967876    | 0.001135492           | 0.015595914         |
| GO:0008233 peptidase activity                                           | 19                                             | 372                                               | 355                                   | 16315                                    | 0.853267544    | 0.00122575            | 0.01663518          |
| GO:0050660 flavin adenine dinucleotide binding                          | 6                                              | 385                                               | 47                                    | 16623                                    | 1.706911091    | 0.001289267           | 0.017291344         |
| GO:0016627 oxidoreductase activity, acting on the CH-CH group of donors | 4                                              | 387                                               | 18                                    | 16652                                    | 2.257783519    | 0.001432468           | 0.018988527         |
| GO:0005576 extracellular region                                         | 7                                              | 384                                               | 69                                    | 16601                                    | 1.478379305    | 0.001768975           | 0.022658783         |
| GO:1901566 organonitrogen compound biosynthetic process                 | 8                                              | 383                                               | 89                                    | 16581                                    | 1.358782923    | 0.001734733           | 0.022658783         |
| GO:0016614 oxidoreductase activity, acting on CH-OH group of donors     | 7                                              | 384                                               | 69                                    | 16601                                    | 1.478379305    | 0.001768975           | 0.022658783         |
| GO:0044248 cellular catabolic process                                   | 8                                              | 383                                               | 92                                    | 16578                                    | 1.32544977     | 0.002105411           | 0.026668541         |

| <b>GO Annotation term</b>                                         | <b># down-regulated proteins with annotation term</b> | <b># down-regulated proteins without annotation term</b> | <b># other proteins with annotation term</b> | <b># other proteins without annotation term</b> | <b>log odds ratio</b> | <b>p-value (uncorrected)</b> | <b>p-value (corrected)</b> |
|-------------------------------------------------------------------|-------------------------------------------------------|----------------------------------------------------------|----------------------------------------------|-------------------------------------------------|-----------------------|------------------------------|----------------------------|
| GO:0070011 peptidase activity, acting on L-amino acid peptides    | 18                                                    | 373                                                      | 347                                          | 16323                                           | 0.819798993           | 0.002183406                  | 0.027352558                |
| GO:1901606 alpha-amino acid catabolic process                     | 3                                                     | 388                                                      | 9                                            | 16661                                           | 2.66120831            | 0.002252818                  | 0.027615189                |
| GO:0016042 lipid catabolic process                                | 3                                                     | 388                                                      | 9                                            | 16661                                           | 2.66120831            | 0.002252818                  | 0.027615189                |
| GO:0019725 cellular homeostasis                                   | 5                                                     | 386                                                      | 36                                           | 16634                                           | 1.789285677           | 0.002342959                  | 0.028414606                |
| GO:0051604 protein maturation                                     | 17                                                    | 374                                                      | 321                                          | 16349                                           | 0.839438436           | 0.00250631                   | 0.029762433                |
| GO:0016485 protein processing                                     | 17                                                    | 374                                                      | 321                                          | 16349                                           | 0.839438436           | 0.00250631                   | 0.029762433                |
| GO:0016757 transferase activity, transferring glycosyl groups     | 7                                                     | 384                                                      | 75                                           | 16595                                           | 1.394636207           | 0.002737391                  | 0.032171395                |
| GO:0016773 phosphotransferase activity, alcohol group as acceptor | 16                                                    | 375                                                      | 292                                          | 16378                                           | 0.872603144           | 0.002814561                  | 0.032740814                |
| GO:1901135 carbohydrate derivative metabolic process              | 10                                                    | 381                                                      | 147                                          | 16523                                           | 1.08186176            | 0.003379579                  | 0.03891636                 |
| GO:1901607 alpha-amino acid biosynthetic process                  | 3                                                     | 388                                                      | 11                                           | 16659                                           | 2.460417566           | 0.003602643                  | 0.040663492                |
| GO:0006790 sulfur compound metabolic process                      | 3                                                     | 388                                                      | 11                                           | 16659                                           | 2.460417566           | 0.003602643                  | 0.040663492                |
| GO:0006575 cellular modified amino acid metabolic process         | 3                                                     | 388                                                      | 12                                           | 16658                                           | 2.37334616            | 0.004427438                  | 0.049483128                |



| <b>PFAM Annotation term</b>                                    | <b># down-regulated proteins with annotation term</b> | <b># down-regulated proteins without annotation term</b> | <b># other proteins with annotation term</b> | <b># other proteins without annotation term</b> | <b>log odds ratio</b> | <b>p-value (uncorrected)</b> | <b>p-value (corrected)</b> |
|----------------------------------------------------------------|-------------------------------------------------------|----------------------------------------------------------|----------------------------------------------|-------------------------------------------------|-----------------------|------------------------------|----------------------------|
| PF01347.17 Lipoprotein amino terminal region                   | 5                                                     | 386                                                      | 3                                            | 16667                                           | 4.27617425            | 3.26E-07                     | 0.000136976                |
| PF00067.17 Cytochrome P450                                     | 15                                                    | 376                                                      | 117                                          | 16553                                           | 1.730609756           | 3.64E-07                     | 0.000136976                |
| PF07859.8 alpha/beta hydrolase fold                            | 7                                                     | 384                                                      | 24                                           | 16646                                           | 2.537138992           | 5.15E-06                     | 0.000968643                |
| PF07690.11 Major Facilitator Superfamily                       | 13                                                    | 378                                                      | 108                                          | 16562                                           | 1.662790128           | 4.13E-06                     | 0.000968643                |
| PF00441.19 Acyl-CoA dehydrogenase, C-terminal domain           | 4                                                     | 387                                                      | 5                                            | 16665                                           | 3.539497746           | 3.12E-05                     | 0.004705816                |
| PF02770.14 Acyl-CoA dehydrogenase, middle domain               | 4                                                     | 387                                                      | 6                                            | 16664                                           | 3.357116182           | 5.11E-05                     | 0.005500848                |
| PF00135.23 Carboxylesterase family                             | 7                                                     | 384                                                      | 36                                           | 16634                                           | 2.13095273            | 4.98E-05                     | 0.005500848                |
| PF00501.23 AMP-binding enzyme                                  | 5                                                     | 386                                                      | 18                                           | 16652                                           | 2.483514393           | 0.000147487                  | 0.013882191                |
| PF13193.1 AMP-binding enzyme C-terminal domain                 | 4                                                     | 387                                                      | 10                                           | 16660                                           | 2.846050491           | 0.000226622                  | 0.017087785                |
| PF08028.6 Acyl-CoA dehydrogenase, C-terminal domain            | 3                                                     | 388                                                      | 3                                            | 16667                                           | 3.760180656           | 0.000226929                  | 0.017087785                |
| PF00106.20 short chain dehydrogenase                           | 8                                                     | 383                                                      | 68                                           | 16602                                           | 1.629177296           | 0.000342917                  | 0.022611685                |
| PF13848.1 Thioredoxin-like domain                              | 3                                                     | 388                                                      | 4                                            | 16666                                           | 3.472438583           | 0.000390374                  | 0.022611685                |
| PF01395.17 PBP/GOBP family                                     | 3                                                     | 388                                                      | 4                                            | 16666                                           | 3.472438583           | 0.000390374                  | 0.022611685                |
| PF13405.1 EF-hand domain                                       | 6                                                     | 385                                                      | 38                                           | 16632                                           | 1.920013805           | 0.000471257                  | 0.023657078                |
| PF00083.19 Sugar (and other) transporter                       | 8                                                     | 383                                                      | 71                                           | 16599                                           | 1.585824407           | 0.000447046                  | 0.023657078                |
| PF00128.19 Alpha amylase, catalytic domain                     | 4                                                     | 387                                                      | 13                                           | 16657                                           | 2.583506138           | 0.000510241                  | 0.024013223                |
| PF02771.11 Acyl-CoA dehydrogenase, N-terminal domain           | 3                                                     | 388                                                      | 5                                            | 16665                                           | 3.249235027           | 0.000613991                  | 0.027196204                |
| PF13792.1 Sulfate transporter N-terminal domain with GLY motif | 3                                                     | 388                                                      | 6                                            | 16664                                           | 3.066853463           | 0.000905363                  | 0.034086933                |
| PF01740.16 STAS domain                                         | 3                                                     | 388                                                      | 6                                            | 16664                                           | 3.066853463           | 0.000905363                  | 0.034086933                |
| PF00916.15 Sulfate transporter family                          | 3                                                     | 388                                                      | 6                                            | 16664                                           | 3.066853463           | 0.000905363                  | 0.034086933                |

| <b>SSP Annotation term</b>    | <b># down-regulated proteins with annotation term</b> | <b># down-regulated proteins without annotation term</b> | <b># other proteins with annotation term</b> | <b># other proteins without annotation term</b> | <b>log odds ratio</b> | <b>p-value (uncorrected)</b> | <b>p-value (corrected)</b> |
|-------------------------------|-------------------------------------------------------|----------------------------------------------------------|----------------------------------------------|-------------------------------------------------|-----------------------|------------------------------|----------------------------|
| SSP<br>Small Secreted Protein | 22                                                    | 369                                                      | 289                                          | 16381                                           | 1.217696527           | 3.15E-06                     | 3.15E-06                   |

| <b>Secretome Annotation term</b>           | <b># down-regulated proteins with annotation term</b> | <b># down-regulated proteins without annotation term</b> | <b># other proteins with annotation term</b> | <b># other proteins without annotation term</b> | <b>log odds ratio</b> | <b>p-value (uncorrected)</b> | <b>p-value (corrected)</b> |
|--------------------------------------------|-------------------------------------------------------|----------------------------------------------------------|----------------------------------------------|-------------------------------------------------|-----------------------|------------------------------|----------------------------|
| secretome<br>Has a SignalP signal sequence | 79                                                    | 312                                                      | 864                                          | 15806                                           | 1.53301679            | 2.46E-24                     | 2.46E-24                   |

## Manipulated Biting Behavior vs Death After Manipulated Biting Behavior

**Table 7:** Overrepresentation of annotation terms within the total of 104 up-regulated *Camponotus floridanus* homologs (2-fold and significant  $Q < 0.05$ , minimum expression of 4) in dead *Camponotus castaneus* ant heads after manipulation (Death After Manipulation samples) compared to gene expression in live manipulated *Camponotus castaneus* ant heads (Manipulated Biting Behavior samples)

**No overrepresented annotation terms**

**Table 8:** Over- and under-representation of annotation terms within the total of 224 down-regulated *Camponotus floridanus* homologs (2-fold and significant  $Q < 0.05$ , minimum expression of 4) in dead *Camponotus castaneus* ant heads after manipulation (Death After Manipulation samples) compared to gene expression in live manipulated *Camponotus castaneus* ant heads (Manipulated Biting Behavior samples)

| GO Annotation term                                                                                               | # down-regulated proteins with annotation term | # down-regulated proteins without annotation term | # other proteins with annotation term | # other proteins without annotation term | log odds ratio | p-value (uncorrected) | p-value (corrected) |
|------------------------------------------------------------------------------------------------------------------|------------------------------------------------|---------------------------------------------------|---------------------------------------|------------------------------------------|----------------|-----------------------|---------------------|
| GO:0008152 metabolic process                                                                                     | 79                                             | 145                                               | 2435                                  | 14402                                    | 1.170134439    | 1.28E-14              | 1.46E-11            |
| GO:0008150 biological_process                                                                                    | 107                                            | 117                                               | 4137                                  | 12700                                    | 1.032286006    | 1.08E-13              | 4.11E-11            |
| GO:0016491 oxidoreductase activity                                                                               | 33                                             | 191                                               | 497                                   | 16340                                    | 1.737015476    | 9.30E-14              | 4.11E-11            |
| GO:0055114 oxidation-reduction process                                                                           | 28                                             | 196                                               | 400                                   | 16437                                    | 1.769915474    | 2.53E-12              | 7.20E-10            |
| GO:0003824 catalytic activity                                                                                    | 78                                             | 146                                               | 2686                                  | 14151                                    | 1.0348344      | 6.90E-12              | 1.57E-09            |
| GO:0044699 single-organism process                                                                               | 56                                             | 168                                               | 1697                                  | 15140                                    | 1.089865973    | 2.09E-10              | 3.98E-08            |
| GO:0044710 single-organism metabolic process                                                                     | 38                                             | 186                                               | 884                                   | 15953                                    | 1.304784602    | 2.95E-10              | 4.81E-08            |
| GO:0003674 molecular_function                                                                                    | 125                                            | 99                                                | 6177                                  | 10660                                    | 0.778859589    | 1.10E-08              | 1.56E-06            |
| GO:0048037 cofactor binding                                                                                      | 13                                             | 211                                               | 154                                   | 16683                                    | 1.898284137    | 3.20E-07              | 4.06E-05            |
| GO:0050662 coenzyme binding                                                                                      | 10                                             | 214                                               | 115                                   | 16722                                    | 1.916157446    | 5.92E-06              | 0.000675093         |
| GO:0016705 oxidoreductase activity, acting on paired donors, with incorporation or reduction of molecular oxygen | 11                                             | 213                                               | 149                                   | 16688                                    | 1.755101978    | 8.75E-06              | 0.000906458         |
| GO:0004252 serine-type endopeptidase activity                                                                    | 8                                              | 216                                               | 78                                    | 16759                                    | 2.074145014    | 1.72E-05              | 0.001629806         |
| GO:0008236 serine-type peptidase activity                                                                        | 8                                              | 216                                               | 91                                    | 16746                                    | 1.91921833     | 4.78E-05              | 0.003635707         |
| GO:0005506 iron ion binding                                                                                      | 10                                             | 214                                               | 147                                   | 16690                                    | 1.668741508    | 4.34E-05              | 0.003635707         |
| GO:0017171 serine hydrolase activity                                                                             | 8                                              | 216                                               | 91                                    | 16746                                    | 1.91921833     | 4.78E-05              | 0.003635707         |
| GO:0016614 oxidoreductase activity, acting on CH-OH group of donors                                              | 7                                              | 217                                               | 69                                    | 16768                                    | 2.059133878    | 6.21E-05              | 0.00442227          |
| GO:0020037 heme binding                                                                                          | 10                                             | 214                                               | 158                                   | 16679                                    | 1.595919767    | 7.69E-05              | 0.004867452         |
| GO:0046906 tetrapyrrole binding                                                                                  | 10                                             | 214                                               | 158                                   | 16679                                    | 1.595919767    | 7.69E-05              | 0.004867452         |
| GO:0016701 oxidoreductase activity, acting on single donors with incorporation of molecular oxygen               | 3                                              | 221                                               | 5                                     | 16832                                    | 3.82204879     | 0.000119119           | 0.007147118         |
| GO:0005576 extracellular region                                                                                  | 6                                              | 218                                               | 70                                    | 16767                                    | 1.885937112    | 0.000486998           | 0.027758884         |

| <b>GO Annotation term</b>                 | <b># down-regulated proteins with annotation term</b> | <b># down-regulated proteins without annotation term</b> | <b># other proteins with annotation term</b> | <b># other proteins without annotation term</b> | <b>log odds ratio</b> | <b>p-value (uncorrected)</b> | <b>p-value (corrected)</b> |
|-------------------------------------------|-------------------------------------------------------|----------------------------------------------------------|----------------------------------------------|-------------------------------------------------|-----------------------|------------------------------|----------------------------|
| GO:0005975 carbohydrate metabolic process | 9                                                     | 215                                                      | 174                                          | 16663                                           | 1.388477222           | 0.00071331                   | 0.037848536                |
| GO:0004497 monooxygenase activity         | 3                                                     | 221                                                      | 11                                           | 16826                                           | 3.033234902           | 0.00073041                   | 0.037848536                |
| GO:0016787 hydrolase activity             | 28                                                    | 196                                                      | 1076                                         | 15761                                           | 0.738377923           | 0.000841252                  | 0.041696861                |
| GO:0051213 dioxygenase activity           | 3                                                     | 221                                                      | 12                                           | 16825                                           | 2.946164092           | 0.000904201                  | 0.042949564                |
| GO:0006629 lipid metabolic process        | 8                                                     | 216                                                      | 146                                          | 16691                                           | 1.443181443           | 0.000985527                  | 0.044940051                |

| <b>PFAM Annotation term</b>                           | <b># down-regulated proteins with annotation term</b> | <b># down-regulated proteins without annotation term</b> | <b># other proteins with annotation term</b> | <b># other proteins without annotation term</b> | <b>log odds ratio</b> | <b>p-value (uncorrected)</b> | <b>p-value (corrected)</b> |
|-------------------------------------------------------|-------------------------------------------------------|----------------------------------------------------------|----------------------------------------------|-------------------------------------------------|-----------------------|------------------------------|----------------------------|
| PF00089.21 Trypsin                                    | 8                                                     | 216                                                      | 65                                           | 16772                                           | 2.257241972           | 5.03E-06                     | 0.002527436                |
| PF07993.7 Male sterility protein                      | 6                                                     | 218                                                      | 30                                           | 16807                                           | 2.73561777            | 6.71E-06                     | 0.002527436                |
| PF00550.20 Phosphopantetheine attachment site         | 4                                                     | 220                                                      | 10                                           | 16827                                           | 3.42082174            | 2.61E-05                     | 0.004916277                |
| PF02719.10 Polysaccharide biosynthesis protein        | 4                                                     | 220                                                      | 10                                           | 16827                                           | 3.42082174            | 2.61E-05                     | 0.004916277                |
| PF01370.16 NAD dependent epimerase/dehydratase family | 5                                                     | 219                                                      | 33                                           | 16804                                           | 2.453230853           | 0.00013155                   | 0.019811459                |
| PF00266.14 Aminotransferase class-V                   | 3                                                     | 221                                                      | 7                                            | 16830                                           | 3.485457725           | 0.000250334                  | 0.031416953                |
| PF00650.15 CRAL/TRIO domain                           | 4                                                     | 220                                                      | 21                                           | 16816                                           | 2.67823047            | 0.000294647                  | 0.031695642                |
| PF01130.16 CD36 family                                | 3                                                     | 221                                                      | 9                                            | 16828                                           | 3.234024455           | 0.000450111                  | 0.042366706                |

| <b>SSP Annotation term</b>    | <b># down-regulated proteins with annotation term</b> | <b># down-regulated proteins without annotation term</b> | <b># other proteins with annotation term</b> | <b># other proteins without annotation term</b> | <b>log odds ratio</b> | <b>p-value (uncorrected)</b> | <b>p-value (corrected)</b> |
|-------------------------------|-------------------------------------------------------|----------------------------------------------------------|----------------------------------------------|-------------------------------------------------|-----------------------|------------------------------|----------------------------|
| SSP<br>Small Secreted Protein | 11                                                    | 213                                                      | 300                                          | 16537                                           | 1.046176206           | 0.002782488                  | 0.002782488                |

| <b>Secretome Annotation term</b>           | <b># down-regulated proteins with annotation term</b> | <b># down-regulated proteins without annotation term</b> | <b># other proteins with annotation term</b> | <b># other proteins without annotation term</b> | <b>log odds ratio</b> | <b>p-value (uncorrected)</b> | <b>p-value (corrected)</b> |
|--------------------------------------------|-------------------------------------------------------|----------------------------------------------------------|----------------------------------------------|-------------------------------------------------|-----------------------|------------------------------|----------------------------|
| secretome<br>Has a SignalP signal sequence | 50                                                    | 174                                                      | 893                                          | 15944                                           | 1.635218987           | 1.08E-17                     | 1.08E-17                   |

### Healthy Ants at 10AM vs Manipulated Biting Behavior vs Death After Manipulated Biting Behavior

**Table 9:** Overrepresentation of annotation terms within the total of 52 *Camponotus floridanus* homologs that are up-regulated in live manipulated *Camponotus castaneus* ant heads (Manipulated Biting Behavior samples) compared to gene expression in healthy *Camponotus castaneus* ant heads sampled at the same time of day (Healthy Ant Controls at 10AM samples) and down-regulated again after manipulation (Death After Manipulation samples) (2-fold and significant  $Q < 0.05$ , minimum expression of 4)

| Secretome Annotation term                  | # up-regulated proteins with annotation term | # up-regulated proteins without annotation term | # other proteins with annotation term | # other proteins without annotation term | log odds ratio | p-value (uncorrected) | p-value (corrected) |
|--------------------------------------------|----------------------------------------------|-------------------------------------------------|---------------------------------------|------------------------------------------|----------------|-----------------------|---------------------|
| secretome<br>Has a SignalP signal sequence | 8                                            | 44                                              | 935                                   | 16074                                    | 1.139663717    | 0.007306394           | 0.007306394         |

**Table 10:** Overrepresentation of annotation terms within the total of 12 *Camponotus floridanus* homologs that are down-regulated in live manipulated *Camponotus castaneus* ant heads (Manipulated Biting Behavior samples) compared to gene expression in healthy *Camponotus castaneus* ant heads sampled at the same time of day (Healthy Ant Controls at 10AM samples) and up-regulated again after manipulation (Death After Manipulation samples) (2-fold and significant  $Q < 0.05$ , minimum expression of 4)

**No overrepresented annotation terms**
